Modification of cell wall polysaccharide spatially controls cell division in *Streptococcus mutans*

**Svetlana Zamakhaeva<sup>1</sup>, Catherine T. Chaton<sup>1,#</sup>, Jeffrey S. Rush<sup>1,#</sup>, Sowmya Ajay Castro<sup>2</sup>, Alexander E. Yarawsky<sup>3</sup>, Andrew B. Herr<sup>3</sup>, Nina M. van Sorge<sup>4, 5</sup>, Helge C. Dorfmüller<sup>2</sup>, Gregory I. Frolenkov<sup>6</sup>, Konstantin V. Korotkov<sup>1</sup> and Natalia Korotkova<sup>1\*</sup>**

<sup>1</sup>Department of Molecular and Cellular Biochemistry, University of Kentucky, Lexington, Kentucky, USA

<sup>2</sup>Division of Molecular Microbiology, School of Life Sciences, University of Dundee, Dundee, United Kingdom

<sup>3</sup>Divisions of Immunobiology and Infectious Diseases, Cincinnati Children's Hospital Medical Center, Cincinnati, Ohio, USA

<sup>4</sup>Department of Medical Microbiology and Infection prevention, Amsterdam University Medical Center, University of Amsterdam, Amsterdam, The Netherlands

<sup>5</sup>Netherlands Reference Laboratory for Bacterial Meningitis, Amsterdam Medical Center, Amsterdam, The Netherlands

<sup>6</sup>Department of Physiology, University of Kentucky, Lexington, Kentucky, USA

# These authors contributed equally to this work.

\*Corresponding author. Correspondence and request for materials should be addressed to N.K.

(email: [nkorotkova@uky.edu](mailto:nkorotkova@uky.edu))

*Short title:* Modification of streptococcal cell wall polysaccharide coordinates cell division

*Keywords:* *Streptococcus*, autolysin, AtlA, glycerol phosphate, cell wall polysaccharide, FtsZ, MapZ

## Abstract

Bacterial cell division is driven by a tubulin homolog FtsZ, which assembles into the Z-ring structure leading to the recruitment of the cell division machinery. In ovoid-shaped Gram-positive bacteria, such as streptococci, MapZ guides Z-ring positioning at cell equators through an, as yet, unknown mechanism. The cell wall of the important dental pathogen *Streptococcus mutans* is composed of peptidoglycan decorated with Serotype c Carbohydrates (SCCs). Here, we show that an immature form of SCC, lacking the recently identified glycerol phosphate (GroP) modification, coordinates Z-ring positioning. Pulldown assays using *S. mutans* cell wall combined with binding affinity analysis identified the major cell separation autolysin, AtlA, as an SCC binding protein. Importantly, AtlA binding to mature SCC is attenuated due to GroP modification. Using fluorescently-labeled AtlA, we mapped SCC distribution on the streptococcal surface to reveal that GroP-deficient immature SCCs are exclusively present at the cell poles and equators. Moreover, the equatorial GroP-deficient SCCs co-localize with MapZ throughout the *S. mutans* cell cycle. Consequently, in GroP-deficient mutant bacteria, proper AtlA localization is abrogated resulting in dysregulated cellular autolysis. In addition, these mutants display morphological abnormalities associated with MapZ mislocalization leading to Z-ring misplacement. Altogether, our data support a model in which GroP-deficient immature SCCs spatially coordinate the localization of AtlA and MapZ. This mechanism ensures cell separation by AtlA at poles and Z-ring alignment with the cell equator.

## Graphical abstract

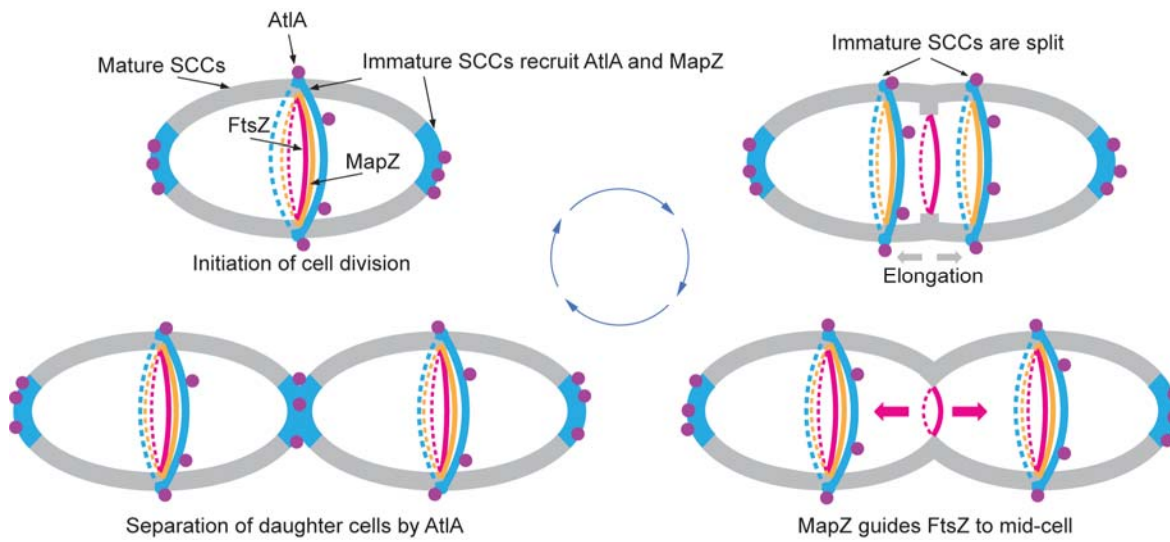

## Introduction

Bacterial cells come in a variety of shapes. The specific bacterial shapes are imposed by their cell wall, which surrounds the cytoplasmic membrane. The main structural component of the cell wall is peptidoglycan, which is composed of glycan strands that are cross-linked by penta-peptides. During cell division, new peptidoglycan is synthesized and inserted into the existing cell wall by the coordinated action of enzymes catalyzing peptidoglycan hydrolysis and synthesis. This process is tightly controlled at both the spatial and temporal level to prevent the loss of cell wall integrity and ultimately guarantee the correct cell morphology.

According to the current model, the morphogenesis of ovoid-shaped Gram-positive bacteria, such as streptococci, enterococci and lactococci, arises from a combination of septal and lateral peptidoglycan synthesis, which is coordinated by multiprotein complexes called the divisome and elongasome, respectively<sup>1-3</sup>. Cell division is initiated by the recruitment and polymerization of FtsZ to form a structure called the Z-ring at mid-cell marked by a microscopically visible “wall band” or “equatorial ring”<sup>1,4,5</sup>. Misplacement of FtsZ leads to severe morphological abnormalities. The Z-ring serves as a scaffold for other components of the cell division machinery, including peptidoglycan polymerases and hydrolases<sup>3,5</sup>, that start cell division by synthesizing a small septal ingrowth below the equatorial ring<sup>1</sup>. Early in division, new equatorial rings appear in the daughter cells, presumably due to splitting of the parental equatorial ring<sup>1</sup>. During the elongation phase, the rings gradually migrate toward the equators of the daughter cells powered by two processes — splitting of the septal ingrowth and synthesis of the lateral wall<sup>1</sup>. When the daughter cells have reached the size of the parental cell, and the equatorial ring approaches the mid-cell region of the nascent daughter cell, elongation is halted. At the same time, synthesis of the septal wall rapidly resumes, followed by final splitting of the complete septum by peptidoglycan hydrolases, or so-called autolysins, to allow the proper separation of the daughter cells<sup>1,4,5</sup>.

It remains unclear what cues in the cell wall direct the recruitment of the cell separation autolysins. Furthermore, it is unknown how FtsZ is targeted to mid-cell. Currently, it is assumed that the correct placement of the Z-ring depends on the chromosomal origin of replication<sup>6</sup> and the FtsZ-binding protein MapZ<sup>7,8</sup>. MapZ forms a stable protein ring that co-migrates with the equatorial ring<sup>7,8</sup>, facilitating the alignment of the Z-ring perpendicular to the long axis of the cell<sup>6</sup>. In *Streptococcus pneumoniae*, the MapZ-ring acts as a continuous guide for the orderly migration of FtsZ from the parental septum to the equatorial rings of daughter cells throughout the cell cycle<sup>9</sup>. In contrast, *Streptococcus mutans* MapZ promotes FtsZ movement to the equators of daughter cells at a later stage in division<sup>10</sup>. MapZ localization and assembly into the ring structure are reported to depend on the direct interaction of the MapZ extracellular domain with an unknown cell wall component residing in the equatorial ring<sup>7,11</sup>.

The cell wall of Gram-positive bacteria contains characteristic anionic glycopolymers covalently attached to peptidoglycan. The best-studied class of cell wall glycopolymers is the canonical poly(glycerol-phosphate) and poly(ribitol-phosphate) wall teichoic acids (WTAs) expressed by *Bacillus subtilis* and *Staphylococcus aureus*, respectively<sup>12</sup>. In these species, WTA-deficient mutants exhibit cell shape abnormalities, defects in the separation of daughter cells, and increased autolysis<sup>13-17</sup>, indicating a functional connection between WTA and the cell division machinery. Many streptococci, including *S. mutans*, lack canonical WTAs. Instead, they express rhamnose (Rha)-containing polysaccharides with a conserved repeating  $\rightarrow 3) \alpha\text{-Rha}(1 \rightarrow 2) \alpha\text{-Rha}(1 \rightarrow$  disaccharide backbone modified with species-specific and serotype-specific glycosyl side-chains. *S. mutans* strains are classified into four serotypes based on variations in the glycosyl side-chains, with serotype *c* being the most common in the oral cavity<sup>18,19</sup>. The polysaccharide in *S. mutans* serotype *c* is referred to as serotype *c*-specific carbohydrate (SCC) and contains  $\alpha$ -glucose (Glc) side-chains attached to the 2-position of the  $\alpha$ -1,3 linked Rha<sup>20</sup>. The homologous polysaccharide in *Streptococcus pyogenes* (Group A *Streptococcus* or GAS), referred to as the Lancefield group A carbohydrate (GAC), carries

$\beta$ -N-acetylglucosamine (GlcNAc) side-chain modifications attached to the 3-position of the  $\alpha$ -1,2 linked Rha<sup>21,22</sup>. There is substantial evidence that SCC and GAC are critical for cell division of streptococci<sup>23-27</sup>. We recently demonstrated that SCC and GAC are also negatively charged polysaccharides, similar to WTAs, through decoration with glycerol phosphate (GroP) moieties<sup>28</sup>. NMR analysis of GAC revealed that GroP is attached to the GlcNAc side-chains of GAC at the C6 hydroxyl group<sup>28</sup>.

In this study, we link GroP modification of SCC to spatial regulation of streptococcal cell division. We show that structurally-diverse SCCs display a specific distribution on the *S. mutans* cell surface with cell equators and poles being populated by 'immature SCCs', which are deficient in the GroP modification. These immature SCCs inform the proper positioning of MapZ and the major cell separation autolysin AtlA. Thus, the presence of GroP-modified SCC in the streptococcal cell wall provides an exclusion strategy for critical cell division proteins involved in the first and the final stages of streptococcal cell division.

## Results

**GroP is attached to the Glc side-chains of SCC.** We have previously shown that GroP attachment to SCC and GAC is catalyzed by a dedicated GroP transferase encoded by *sccH/gach*<sup>28</sup>. This gene is located in the 12-gene loci, *sccABCDEFGHIHMNPQ* (Fig. 1a), and *gacABCDEFGHIJKL*<sup>29</sup>, which encode the biosynthesis machinery for SCC and GAC, respectively. Because in GAS, GacH is required to transfer GroP to the GlcNAc side-chains of GAC<sup>28</sup>, we suggested that SccH similarly modifies the Glc side-chains of SCC with GroP in *S. mutans*. To test this hypothesis, we generated *S. mutans* c serotype strains that were devoid of the Glc side-chains. In GAS, the GtrB-type glycosyltransferase, GacI, is critical for GAC GlcNAc side-chain modification through the formation of the donor molecule GlcNAc-phosphate-undecaprenol<sup>30</sup>. The SCC gene cluster (Fig. 1a) contains two putative GtrB-type glycosyltransferases encoded by *sccN* and *sccP*. To investigate the function of SccN and SccP in the synthesis of the Glc donor for side-chain addition to SCC, we deleted *sccN* and

*sccP* in *S. mutans* serotype *c* strain Xc, creating  $\Delta sccN$ ,  $\Delta sccP$ , and the double mutant  $\Delta sccN\Delta sccP$ .

The glycosyl composition of purified SCCs exhibited a significantly reduced amount of Glc in  $\Delta sccN$  and  $\Delta sccN\Delta sccP$  (Fig. 1b). In contrast, the deletion of *sccP* alone did not affect Glc levels. The Glc content of SCC was restored in  $\Delta sccN$  by complementation with *sccN* on an expression plasmid ( $\Delta sccN:p sccN$ , Fig. 1b). These data strongly support a major role for SccN in Glc side-chain formation of SCC. Interestingly, the Glc content of SCC in  $\Delta sccN\Delta sccP$  was lower than in  $\Delta sccN$  (Fig. 1b), suggesting that *sccP* might play a minor role in providing a Glc donor for modification of SCC with the side-chains (Supplementary Fig. 1a). Furthermore, we found that the glycerol and phosphate content in the polysaccharide isolated from  $\Delta sccN$  was significantly reduced (Fig. 1b), similar to the  $\Delta sccH$  mutant (Fig. 1b). We have previously provided conclusive evidence that glycerol and phosphate detected in this analysis are, in fact, GroP<sup>28</sup>. The deficiency of glycerol and phosphate in the  $\Delta sccN$  mutant was reversed by complementation with *sccN*, supporting the conclusion that the Glc-side chains of SCC are further modified with GroP by SccH (Supplementary Fig. 1a, b and c).

**GroP modification controls the self-aggregation and morphology of *S. mutans*.** We observed that planktonic  $\Delta sccH$  and  $\Delta sccN$  have a strong tendency to spontaneously sediment after overnight growth, as compared to the wild type (WT) strain and the complemented strains,  $\Delta sccH:p sccH$  and  $\Delta sccN:p sccN$ , which remained in suspension (Fig. 2a). Microscopic analysis of bacteria revealed that  $\Delta sccH$  and  $\Delta sccN$ , but not the WT strain,  $\Delta sccH:p sccH$  and  $\Delta sccN:p sccN$ , formed the typical short chains that clump together (Fig. 2b). Furthermore, the bacterial aggregates of  $\Delta sccH$  and  $\Delta sccN$  were not dispersed when DNase was added to the growth medium (Supplementary Fig. 2), suggesting that this bacterial behavior is due to cell-cell interactions.

Analysis of WT,  $\Delta sccH$ , and  $\Delta sccN$  by scanning electron microscopy (SEM) and differential interference contrast (DIC) microscopy revealed that the mutant cells have severe cell division defects. The WT bacteria displayed the characteristic oval shape with the average cell length of  $0.88\pm 0.11\ \mu\text{m}$  in the exponential growth phase (Fig. 2c, d, and e and Supplementary Table 3). In

contrast, the majority of the  $\Delta sccH$  and  $\Delta sccN$  cells were significantly shorter than the WT cells with the average length of  $0.74 \pm 0.14 \mu\text{m}$  and  $0.78 \pm 0.18 \mu\text{m}$ , respectively (Fig. 2e and Supplementary Table 3). Additionally, the distribution in the length of the individual  $\Delta sccH$  and  $\Delta sccN$  cells differed significantly compared to WT (Supplementary Fig. 3); 21% of the  $\Delta sccH$  cells ( $n = 86$ ) and 14% of the  $\Delta sccN$  cells ( $n = 117$ ) were abnormally small, while only 2% of the WT cells displayed the minimal cell length (Supplementary Table 3). The small cells of  $\Delta sccH$  and  $\Delta sccN$  were frequently paired with larger cells (Fig. 2c and d), implying that these cells resulted from asymmetrically cell division, giving rise to daughter cells with unequal sizes. Finally, cells with the orientation of the division plane not perpendicular to the long axis of the cell were also observed in the  $\Delta sccH$  and  $\Delta sccN$  mutants (Fig. 2c). The morphological phenotypes were restored to WT in  $\Delta sccH:pscH$  and  $\Delta sccN:pscN$  (Fig. 2c, e and Supplementary Table 3). These phenotypes were also correlated with a significant decrease in cell viability of  $\Delta sccH$  determined by colony-forming unit count, in comparison to WT and  $\Delta sccH:pscH$  (Supplementary Fig. 4). We thus concluded that either GroP or the epitope presented by the Glc side-chains modified with GroP are required for proper morphogenesis of *S. mutans*.

To dissect the structural requirements underlying these morphological processes, we replaced the SCC Glc side-chains with GlcNAc in *S. mutans* by plasmid-based expression of *gacHIJKL*<sup>30</sup> in  $\Delta sccN$  creating  $\Delta sccN:pgacHIJKL$  (Supplementary Fig. 1d and e). These genes (Supplementary Fig. 1e) are required for the formation and addition of the GAC GlcNAc side-chains and GroP in GAS<sup>30</sup>. Additionally, as a negative control, we expressed *gacHI\*JKL* in the  $\Delta sccN$  genetic background creating  $\Delta sccN:pgacHI*JKL$ . This strain does not synthesize the GlcNAc donor for side-chain addition since it carries a stop codon in *gacI*. The cell wall polysaccharide purified from  $\Delta sccN:pgacHIJKL$  showed increased levels of GlcNAc and GroP (Fig. 2f), whereas GlcNAc and GroP were not restored by expression of *gacHI\*JKL* in  $\Delta sccN$  (Fig. 2f). The morphological phenotypes of  $\Delta sccN$  were only reversed to WT by expression of *gacHIJKL* but not *gacHI\*JKL* (Fig. 2a, b, c, e, Supplementary Fig. 3 and Supplementary Table 3). These observations indicate that the underlying molecular mechanisms



for clumping behavior and the morphological abnormalities are GroP-dependent and independent of the specific glycosyl side chain. The simple explanation for the self-aggregation of bacteria is that  $\Delta sccH$  and  $\Delta sccN$  lack a negative surface charge provided by GroP, which normally contributes to electrostatic repulsion between the WT cells.

**GroP modification protects *S. mutans* from autolysis.** It has been reported that the WTA-deficient mutant of *S. aureus* show increased fragility and autolysis due to mislocalization and increased abundance of the major cell division autolysin, Atl, on the bacterial surface<sup>15</sup>. Hence, to understand whether and how GroP and the Glc side-chains in SCC affect *S. mutans* autolysis, we compared autolysis of the WT,  $\Delta sccH$ ,  $\Delta sccN$  and the complemented strains  $\Delta sccH:psscH$ ,  $\Delta sccN:psscN$ ,  $\Delta sccN:pgacHIJKL$  and  $\Delta sccN:pgacHI*JKL$  by analyzing the change in OD<sub>600</sub> in liquid cultures after the addition of a mild detergent Triton-X100. While *S. mutans* WT is relatively resistant to detergent-induced lysis (Fig. 3a),  $\Delta sccH$  and  $\Delta sccN$  are sensitive to the autolytic effect of Triton X-100. Cellular lysis was more pronounced in  $\Delta sccN$ , than in  $\Delta sccH$ , resulting in significant loss of turbidity of the mutant suspension after 2 hours (Fig. 3a). The phenotypes of  $\Delta sccH$  and  $\Delta sccN$  were reversed to WT in  $\Delta sccH:psscH$  and  $\Delta sccN:psscN$ . Furthermore, expression of *gacHIJKL*, but not *gacHI\*JKL*, in the  $\Delta sccN$  mutant restored the resistance of bacteria to autolysis. These data indicate the importance of GroP and side-chain modifications of SCC in protecting *S. mutans* from adventitious cellular lysis by an unknown autolytic enzyme.

**AtIA promotes autolysis of the mutants lacking GroP and side-chain modifications.** A possible mechanistic explanation for enhanced autolysis of  $\Delta sccH$  and  $\Delta sccN$  could be that the absence of GroP and Glc side-chain modifications in SCC causes a dysregulated localization of an unknown autolysin. To identify autolytic enzymes that interact with SCCs, we stripped the cell surface-associated proteins from *S. mutans* WT cells using 8 M urea, re-folded the released proteins by dialysis, and used the re-folded proteins for pulldown experiments with the protein-deficient cell wall material purified from *S. mutans*. Two major proteins, isolated by the pulldown approach, were

identified as AtIA and SmaA by LC-MS/MS analysis (Fig. 3b). One of these, AtIA, is the major autolysin involved in the separation of daughter cells after division<sup>31-34</sup>. The protein contains an N-terminal putative cell wall-binding domain, which consists of six Bsp repeats (PF08481) and a C-terminal family GH25 catalytic domain (PF01183) (Fig. 3c). SmaA has two Bsp repeats and three bacterial Src homology 3 (SH3) domains (Fig. 3c). Although SmaA has been implicated in peptidoglycan hydrolysis<sup>35</sup>, the protein lacks a putative catalytic domain.

To confirm the identities of the proteins, we generated  $\Delta atIA$  and  $\Delta smaA$  deletion mutants. Using a similar approach as described above, surface proteins were stripped from the  $\Delta atIA$  and  $\Delta smaA$  bacteria and used in pulldown experiments. In agreement with the results of protein identification, the bands corresponding to AtIA and SmaA were absent in  $\Delta atIA$  and  $\Delta smaA$ , respectively (Fig. 3b). To investigate the contribution of AtIA and SmaA in Triton X-100-induced autolysis of WT,  $\Delta scsH$ , and  $\Delta scsN$ , we deleted *atIA* in the  $\Delta scsH$  and  $\Delta scsN$  backgrounds, and *smaA* in the  $\Delta atIA$  and  $\Delta scsN$  backgrounds, generating the  $\Delta smaA\Delta atIA$ ,  $\Delta scsH\Delta atIA$ ,  $\Delta scsN\Delta atIA$ , and  $\Delta scsN\Delta smaA$  mutants. As expected, the  $\Delta atIA$ ,  $\Delta smaA$ , and  $\Delta smaA\Delta atIA$  mutants are relatively resistant to detergent-stimulated lysis (Fig. 3a, Supplementary Fig. 5). The  $\Delta scsN\Delta smaA$  mutant displayed increased cellular lysis, similar to  $\Delta scsN$ , indicating that SmaA is not involved in detergent-induced autolysis of  $\Delta scsN$  (Supplementary Fig. 5b). In contrast, the deletion of *atIA* in the  $\Delta scsH$  and  $\Delta scsN$  backgrounds restored the bacterial resistance to the autolytic effect of Triton X-100 (Fig. 3a). These results clearly show that autolysis of  $\Delta scsH$  and  $\Delta scsN$  is AtIA-mediated.

Next, we investigated whether the deletion of SmaA or AtIA affected morphology and self-aggregation of *S. mutans*. The  $\Delta smaA$  cells remained in suspension after overnight growth (Fig. 3d), and showed WT cell morphology, cell separation, and cell length distribution (Fig. 3e, f, Supplementary Fig. 3 and Supplementary Table 3). The  $\Delta atIA$  cells grew in long chains (Fig. 3e) that settle at the bottom of the tube (Fig. 3d), which is in line with the published observation<sup>33</sup>. However, in contrast to  $\Delta scsH$  and  $\Delta scsN$ , the individual  $\Delta atIA$  cells displayed normal dimensions, and the long

chains of  $\Delta atIA$  did not self-aggregate (Fig. 3e, f, Supplementary Fig. 3, and Supplementary Table 3). Finally, we examined the phenotype of the  $\Delta sccH\Delta atIA$  mutant to understand more about the link between AtIA and GroP modification of SCC. The phenotype of  $\Delta sccH\Delta atIA$  was a combination of the phenotypes of single mutants. Notably, similar to  $\Delta atIA$ , the double mutant displayed a chaining phenotype, and like  $\Delta sccH$ , the long chains of the double mutant formed clumps (Fig. 3e), supporting the hypothesis that self-aggregation of  $\Delta sccH\Delta atIA$  is due to loss of electrostatic repulsion between the cells. Furthermore, SEM and DIC analyses of  $\Delta sccH\Delta atIA$  revealed a variety of aberrant cell shapes and size that contrast with the morphology of WT and  $\Delta atIA$ , but similar to  $\Delta sccH$ . (Fig. 3e, f, Supplementary Fig. 3 and Supplementary Table 3). Altogether, these data indicate that, although autolysis of  $\Delta sccH$  and  $\Delta sccN$  requires AtIA, the cell shape abnormalities observed in  $\Delta sccH$  and  $\Delta sccN$  are not linked to either SmaA or AtIA.

#### **GroP modification coordinates the localization of AtIA at the cell pole and mid-cell.**

Considering the established function of AtIA in the autolysis of  $\Delta sccH$  and  $\Delta sccN$ , we hypothesized that the enzyme is either mislocalized or over-expressed in these mutants. To examine the expression of AtIA, the protein was extracted from the cell surface of the WT,  $\Delta sccH$ , and  $\Delta sccN$  bacteria. Western blot analysis with anti-AtIA antibodies revealed no significant differences in the amount of AtIA recovered from *S. mutans* WT or the mutants (Supplementary Fig. 6).

Next, we monitored the localization of AtIA on the cell surface of WT,  $\Delta sccH$ , and  $\Delta sccN$  by immunofluorescent microscopy using anti-AtIA antibodies and fluorescent secondary antibodies (Fig. 3g). The autolysin localized to the cell poles and the mid-cell of the WT strain. Secondary antibodies alone showed no specific binding to *S. mutans* (Supplementary Fig. 7a). In the case of  $\Delta sccH$  and  $\Delta sccN$ , the autolysin was evenly distributed over the cell surface, and showed no distinct surface localization pattern (Fig. 3g).

To provide a more detailed picture of the bacterial regions targeted by AtIA, we fused the N-terminal Bsp repeat domain of AtIA with a green fluorescent protein (GFP)<sup>36</sup>, generating AtIA-GFP

(Fig. 3c). The fusion protein was added exogenously to exponentially growing *S. mutans* WT,  $\Delta sccH$ ,  $\Delta sccN$ ,  $\Delta sccH:psscH$  and  $\Delta sccN:psscN$  cells. Fluorescence microscopy imaging indicated that in newborn WT cells, AtIA-GFP predominantly targeted poles and mid-cell zones (Fig. 3h). Surprisingly, in the cells that were beginning to elongate, the sites labeled by incubation with AtIA-GFP split as a pair of rings (Fig. 3h). Splitting of the mid-cell sites was observed in 47% of the cells (64/135). The mid-cell localization of AtIA-GFP in newborn cells and the duplicated AtIA-GFP localization signal in elongating cells correlate with the position of the equatorial ring in ovococci<sup>4,37</sup>. In contrast, AtIA-GFP added to  $\Delta sccH$  and  $\Delta sccN$  was uniformly distributed along the bacterial cell surface (Fig. 3h). The complemented strains  $\Delta sccH:psscH$  and  $\Delta sccN:psscN$  demonstrated localization of AtIA-GFP similar to the WT strain (Fig. 3h). GFP alone failed to bind to the bacteria (Supplementary Fig. 7b). Together our findings provide three important insights: i) the N-terminal Bsp repeat domain of AtIA is sufficient for proper binding of AtIA to the bacterial surface; ii) the Bsp repeat domain recognizes the specific cell wall component incorporated in cell poles and the regions corresponding to equatorial rings; iii) the absence of GroP and side-chain decorations on SCC correlate with mislocalized binding of AtIA across the entire surface of *S. mutans*.

**AtIA binds to SCC.** To identify the cell surface structure targeted by AtIA-GFP, we examined the binding of the protein fusion to sacculi purified from *S. mutans* WT,  $\Delta sccH$  and  $\Delta sccH:psscH$ . The sacculi were free of LTA, proteins, lipids and nucleic acids<sup>30</sup>. Fluorescence microscopy imaging revealed that AtIA-GFP associated with the sacculi derived from these cells with patterns very similar to that observed with intact *S. mutans* cells (Fig. 3i). AtIA-GFP was found primarily at the poles and mid-cell sites of WT and  $\Delta sccH:psscH$  sacculi, but was distributed evenly along the surface of  $\Delta sccH$  sacculi. Furthermore, the splitting of AtIA-GFP-labeled mid-cell sites in WT and the complemented cells was observed. Splitting was detected in 50% of WT cells (63/125). GFP alone was unable to attach to the sacculi (Supplementary Fig. 7c). This observation confirmed that the N-terminal domain of AtIA recognizes a cell wall component, either SCC or peptidoglycan, associated with the cell

equators and poles.

Notably, secreted proteins consisting of multiple Bsp repeats are widespread in Firmicutes, with most bacteria belonging to the *Streptococcus* genus (Supplementary Fig. 8). Intriguingly, there is an obvious correlation between the co-occurrence of the genes encoding proteins with Bsp repeats and Rha-containing cell wall polysaccharides in these bacteria (Supplementary Table 4). In fact, in many streptococci, a gene encoding a putative autolysin with Bsp repeats is situated immediately downstream of the gene loci involved in the biosynthesis of the Rha-containing polysaccharide, raising the possibility that the Bsp repeat domain binds Rha-containing cell wall polysaccharides. Thus, to examine the role of SCCs in the recruitment of AtIA, we applied a co-sedimentation assay that exploits the property of AtIA-GFP to associate with the cell wall material purified from WT *S. mutans*,  $\Delta sccH$  and  $\Delta sccH:psscH$ . In agreement with the fluorescent microscopy experiments, we observed a very strong binding of the fusion protein to WT *S. mutans*,  $\Delta sccH$  and  $\Delta sccH:psscH$  cell walls (Fig. 4a). GFP alone did not attach to cell walls purified from *S. mutans* WT (Fig. 4b). Next, we chemically cleaved the polysaccharides from peptidoglycan using mild acid hydrolysis. SCCs were efficiently released from the cell walls in these conditions (Supplementary Fig. 9a). We observed a significant reduction in AtIA-GFP binding to the SCC-depleted cell wall (Fig. 4a), supporting the role of SCCs in targeting of AtIA to the equatorial rings and the poles of the WT bacteria. To further investigate the participation of SCCs in cellular localization of AtIA, we constructed a SCC-deficient mutant by in-frame deletion of the *rgpG* gene whose product catalyzes the first step in SCC biosynthesis<sup>38</sup>. The  $\Delta rgpG$  mutant was devoid of polyrhamnose polysaccharide (<0.5% WT level), and in agreement with the published data<sup>39,40</sup>, demonstrated self-aggregation and aberrant morphology (Supplementary Fig. 9a and b). Applying AtIA-GFP to the intact  $\Delta rgpG$  bacteria (Supplementary Fig. 9c) and to the cell wall purified from  $\Delta rgpG$  (Fig. 4b), no evidence of binding was observed in either assay. These results strongly indicate that SCC is a binding receptor of AtIA.

**AtIA binds to SCC via the polyrhamnose backbone.** The ability of AtIA to target distinct sites on

the *S. mutans* cell might be explained by binding of the autolysin to a specific form of SCC present in the equatorial rings and the poles. Our observation that AtIA-GFP is uniformly distributed over the cell surface of the side-chain-deficient mutant,  $\Delta sccN$ , suggests that the N-terminal domain of AtIA binds to polyrhamnose regions on SCC. To determine if AtIA specifically binds the polyrhamnose backbone of SCC we compared the binding of AtIA-GFP to intact cells, or purified cell walls, of bacterial strains that express cell wall polysaccharides containing this backbone feature (*GAS* and *Streptococcus equi*)<sup>29</sup> with other bacterial strains that express Rha-containing cell wall polysaccharides lacking this structure (Group B *Streptococcus* or GBS, and *Enterococcus faecalis*) (Supplementary Fig. 10a, b, c, d and e). No significant binding was observed to the cell walls or intact cells of GBS and *E. faecalis* (Fig. 4b and Supplementary Fig. 10f). In contrast, as compared to GFP control, AtIA-GFP strongly binds to the cell wall material purified from *GAS* (Fig. 4b) and the intact *GAS* and *S. equi* cells (Supplementary Fig. 10f), suggesting that the polyrhamnose backbone of GAC, SCC and the *S. equi* cell wall polysaccharide is recognized by AtIA.

To gather additional evidence that AtIA interacts with the polyrhamnose backbone, we took advantage of a previously developed heterologous expression model in *E. coli*. Specifically, complementation of the SCC polyrhamnose biosynthetic genes *sccABCDEFGG* in *E. coli* results in the decoration of lipopolysaccharide with polyrhamnose<sup>41,42</sup>. The expression of polyrhamnose on the surface of *E. coli* was confirmed by anti-GAC antibodies that recognize the GAC polyrhamnose backbone (Supplementary Fig. 11). Flow cytometric analysis revealed that AtIA-GFP only bound to polyrhamnose-producing *E. coli* and not to the parental strain (Fig. 4c). These data unambiguously demonstrate that the SCC polyrhamnose backbone is sufficient to confer AtIA binding. GFP alone did not bind to the recombinant bacteria (Fig. 4c).

**GroP and the Glc side-chains hinder AtIA-GFP binding to the polyrhamnose backbone.** To investigate how the presence of the SCC side-chain substituents affects recognition of the polyrhamnose backbone by AtIA, we compared AtIA binding affinities to various SCCs using

fluorescence polarization anisotropy. The SCC variants prepared from WT,  $\Delta sccH$ ,  $\Delta sccN$ , and  $\Delta sccN\Delta sccP$  were conjugated with a fluorescent tag (ANDS). The colorless AtIA-GFP variant protein, AtIA-cGFP, was incubated with the fluorescently labeled SCCs at varying concentrations (Fig. 4d). We observed that the binding of the  $\Delta sccN\Delta sccP$  SCC is the strongest, with an apparent  $K_d = 0.9 \mu\text{M}$  (95% confidence interval: 0.6-1.2), which is in the range of the binding affinity of known lectins for complex glycans<sup>43,44</sup>. While binding of the WT,  $\Delta sccH$ , and  $\Delta sccN$  SCCs was unable to reach saturation due to solubility constraints, they all demonstrate clear evidence of binding to AtIA-cGFP (Fig. 4d). The  $\Delta sccN$  SCC has the second-highest affinity, estimated to be at least 12-fold weaker than  $\Delta sccN\Delta sccP$ , with the  $\Delta sccH$  and WT SCCs being indistinguishable under accessible conditions. Both SCCs have at least a 25-fold lower affinity compared to SCC isolated from  $\Delta sccN\Delta sccP$  bacteria. The differences in binding of the SCC variants suggest that the primary recognition site of the AtIA Bsp repeat domain is unmodified polyrhamnose, and the addition of branching structures decreases binding affinity, presumably due to steric hindrance. The differences in binding between the  $\Delta sccN\Delta sccP$  and  $\Delta sccN$  SCCs further reinforces our hypothesis that both SccN and SccP provide the Glc donor for modification of SCC with the side-chains.

To further explore differences in binding of AtIA-GFP to the SCCs extracted from WT,  $\Delta sccH$ , and  $\Delta sccN$ , we employed analytical ultracentrifugation. Continuous c(s) distribution analysis estimated AtIA-GFP to have a molecular weight of ~110 kDa, confirming that the protein fusion remains mostly monomeric at the concentration range being studied (Fig. 4e). This verifies that assembly is polysaccharide-dependent and not a function of the GFP tag. Upon addition of the WT,  $\Delta sccH$ , or  $\Delta sccN$  SCCs, higher-order complexation was observed between 10-20 S (Fig. 4e). The width of the distribution and the high s values of the largest species imply that many different permutations are occurring simultaneously. There is likely an equilibrium of different combinations: one AtIA protein bound to multiple SCCs, multiple proteins bound to a single SCC, and higher-order configurations of SCCs and AtIA proteins bridging and/or daisy-chaining together to form very large assemblies.

Because  $c(s)$  is a weight-averaged model, molecular weight estimates are not meaningful for these types of distributions. However, the experiments demonstrate that WT SCC produces, on average, a lower-sized complex than either the  $\Delta sccH$  or  $\Delta sccN$  polysaccharides.

To better understand overall complexation, the same data were analyzed using wide distribution analysis (Fig. 4f). Each sample resolved into a more Gaussian distribution, with a weight-averaged sedimentation coefficient of 5.5 S for AtIA-GFP alone, 10.6 S for the WT SCC, 12.3 S for the  $\Delta sccH$  SCC, and 14.5 S for the  $\Delta sccN$  SCC. Based on these values, wide distribution analysis also confirms the formation of smaller complexes in the presence of WT SCCs compared to the  $\Delta sccH$  and  $\Delta sccN$  polysaccharides. Thus, our results indicate that AtIA-GFP binds to the polyrhamnose backbone of SCC, and the modification of SCC with GroP and the Glc side-chains obstruct AtIA-GFP attachment to the polyrhamnose backbone.

**SCC is highly heterogeneous with regard to GroP modification.** AtIA localization studies together with the analysis of AtIA-GFP binding affinity are consistent with the idea that *S. mutans* equatorial sites and poles contain SCCs deficient in either GroP or Glc-GroP, whereas the sidewalls carry the fully mature SCC species decorated with Glc-GroP. Importantly, carbohydrate analysis of SCCs extracted from *S. mutans* WT,  $\Delta sccH$  and  $\Delta sccH:psscH$  cell walls by mild acid hydrolysis established that deletion of *sccH* has no significant effect on total SCC content (Supplementary Fig. 9b). This fact excludes the possibility that the mislocalized binding of AtIA along the entire surface of  $\Delta sccH$  bacteria is due to increased expression of SCC within the cell wall. To further test our hypothesis that *S. mutans* peptidoglycan is decorated with the SCC variants lacking either GroP or Glc-GroP, we separated the extracted SCCs using anion-exchange chromatography. The majority of WT SCC is negatively charged and binds tightly to the anion-exchange column, eluting as a broad peak (Fig. 4g). However, a substantial portion (~15-20 %) is neutral, with very low phosphate content, and does not bind to the anion-exchange column. Our previous work on the GAC revealed similar results<sup>28</sup>, suggesting that streptococcal species produce different forms of the cell wall



polysaccharides. As we previously reported, the phosphate content in GAC and SCC is an indication of the presence of the GroP modification in the polysaccharide<sup>28</sup>. Analysis of the glycosyl composition in the two fractions revealed that the column-bound fraction contains more Glc relative to Rha than the unbound fraction (Fig. 4h). As expected, SCC extracted from  $\Delta sccH$  elutes as a single peak of neutral SCC, lacking detectable phosphate (Supplementary figure 12).

To further characterize the heterogeneity of the SCC variants, we examined the electrophoretic mobility of ANDS-conjugated polysaccharides extracted from WT,  $\Delta sccH$ ,  $\Delta sccN$ ,  $\Delta sccP$  and  $\Delta sccN\Delta sccP$  (Fig. 4i). Since ANDS introduces a negative charge to SCC, this fluorescent tag allows examination of electrophoretic mobility of neutral polysaccharides extracted from the GroP-deficient mutants:  $\Delta sccH$ ,  $\Delta sccN$  and  $\Delta sccN\Delta sccP$ . We observed the distinctive “laddering” of bands in the SCCs extracted from WT and  $\Delta sccP$ , indicating the high level of heterogeneity of the polysaccharides. As expected and in agreement with the anion-exchange chromatography analysis, the SCCs extracted from  $\Delta sccH$ ,  $\Delta sccN$  and  $\Delta sccN\Delta sccP$  migrated as a single band. Altogether, these data indicate that *S. mutans* WT produces SCC variants with different degrees of GroP modification.

**Z-ring positioning is controlled by GroP modification.** The morphological abnormalities of  $\Delta sccH$  and  $\Delta sccN$  suggest a role for GroP modification of SCC in regulating either the assembly or correct positioning of the Z-ring. To test this hypothesis, we expressed FtsZ fused with tagRFP (FtsZ-tagRFP) from its chromosomal locus as the only copy in WT and  $\Delta sccH$  cells (the *ftsZ-tagRFP* and  $\Delta sccH ftsZ-tagRFP$  strains). To identify the localization of the GroP-deficient SCCs on the surface of *S. mutans*, we added AtIA-GFP exogenously to the *ftsZ-tagRFP* and  $\Delta sccH ftsZ-tagRFP$  strains. As expected, we observed both FtsZ-tagRFP and AtIA-GFP at the mid-cell in newborn WT cells (Fig. 5a, stage 1). In the cells beginning to elongate, the AtIA-GFP signal splits into two parallel bands that move away from the division site where a single FtsZ-ring is present (Fig. 5a, stages 2 and 3). During middle-to-late cell division stage, a part of FtsZ splits into two rings and migrates to the mid-cell

regions of the newly forming daughter cells, resulting in a distinctive three-band pattern (Fig. 5a, stage 4). AtIA-GFP was already localized at these sites, suggesting that the wall regions carrying the GroP-deficient SCCs are present at the equators of daughter cells prior to the arrival of FtsZ (Fig. 5a, stage 4). This localization pattern is consistent with our idea that the equatorial rings contain immature SCCs that lack GroP. Interestingly, during the late cell division stage, the AtIA-GFP signal was detected at the constricting septum (Fig. 5a, stage 5), indicating that the GroP-deficient SCCs are inserted in the septal cell wall during the pole maturation.

In the  $\Delta sccH$  *ftsZ-tagRFP* cells, the AtIA-GFP signal was evenly distributed along the cell surface, reflecting the presence of the GroP-deficient SCCs throughout the whole cell wall. While FtsZ was able to assemble into the Z-ring structures in the mutant cells, some Z-rings were often displaced from the cell center or not perpendicular to the cell's axis (Fig. 5b and Supplementary figure 13a). These data indicate that the morphological defects of  $\Delta sccH$  arise from a misplacement of the Z-ring.

**GroP modification regulates MapZ-ring positioning.** The above results suggest that the correct positioning of Z-ring at the mid-cell depends on the presence of the GroP-deficient SCCs in the equatorial ring. Intriguingly, the cell shape alterations, together with the Z-ring misplacement observed in  $\Delta sccH$ , are reminiscent of *S. pneumoniae* and *S. mutans* mutants lacking MapZ<sup>7-10</sup>, implicating the GroP-deficient SCCs in the recruitment of MapZ to the equatorial ring. To test this hypothesis, we expressed the fusion of MapZ with GFP (MapZ-GFP) in the WT and  $\Delta sccH$  genetic backgrounds resulting in the *mapZ-GFP* and  $\Delta sccH$  *mapZ-GFP* strains. To analyze the correlation between MapZ and FtsZ, we generated the MapZ-GFP/FtsZ-tagRFP double expressing strains both in the WT and  $\Delta sccH$  genetic backgrounds resulting in the *ftsZ-tagRFP mapZ-GFP* and  $\Delta sccH$  *ftsZ-tagRFP mapZ* strains. The localization of the GroP-deficient SCCs on the surface of the *mapZ-GFP* strain was monitored by labeling bacteria with AtIA-tagRFP protein (the tagRFP fusion with the N-terminal Bsp repeats domain of AtIA), which was added exogenously. As expected from previous studies<sup>6-10</sup>, in the WT newborn cells, the MapZ-ring coincides with the FtsZ-ring at mid-cell (Fig. 5c,

stage 1). As cell division progresses, MapZ migrates as a pair of rings, parallel to the respective equators of newly forming daughter cells, while a single FtsZ-ring remains at the mid-cell of the parental cell (Fig. 5c, stages 2 and 3). At a later cell division stage, the majority of the FtsZ arrives at the future division sites in the daughter cells, where it co-localizes with MapZ (Fig. 5c, stage 4). AtIA-tagRFP associated with the WT cells with patterns very similar to that observed with AtIA-GFP being enriched at the poles and mid-cell regions (Fig. 5d). Importantly, the MapZ signal co-localizes with GroP-deficient SCCs indicated by AtIA-tagRFP labeling at mid-cell regions in newborn and elongating WT cells (Fig. 5d), which is consistent with the idea that these immature SCCs are present in the equatorial rings.

Strikingly, in the  $\Delta scch$  (strains  $\Delta scch$  *mapZ-GFP* and  $\Delta scch$  *ftsZ-tagRFP mapZ-GFP*) cells, MapZ did not assemble into the characteristic ring-like structures, but instead the MapZ-GFP fluorescent signal was dispersed throughout the membrane of the mutants (Fig. 5e and Supplementary figure 13b). As expected from the proposed function of MapZ in guiding FtsZ positioning<sup>7-10</sup>, Z-rings were mislocalized in the  $\Delta scch$  cells (Fig. 5e). These results indicate that the enrichment of the GroP-deficient SCCs at the equatorial rings drives the recruitment and assembly of MapZ into the ring-like structures. The underlying mechanism likely relies on an exclusion strategy whereby decoration of SCC with GroP at distinct cellular positions provides the molecular signal to exclude recruitment of MapZ and FtsZ to these sites.

## Discussion

Despite years of intensive research, it remains unclear how oval-shaped Gram-positive bacteria generate equally sized daughter cells after division. This work uncovers a mechanism of molecular exclusion to position the cell division machinery in the human pathogen *S. mutans*. Our results are consistent with a model in which GroP-deficient SCCs are enriched at the equatorial rings and poles.

Such controlled distribution of the polysaccharides provides the molecular cues for the simultaneous recruitment of cell division machinery as well as proper daughter cell separation.

Rha-containing cell wall polysaccharides are expressed by a wide variety of streptococcal, lactococcal and enterococcal species<sup>29</sup>. We recently reported the discovery of GroP modification in the *S. mutans* and GAS cell wall polysaccharides, SCC and GAC, respectively<sup>28</sup>. This modification is likely present in other streptococci since homologs of *scch*, which encodes the *S. mutans* GroP transferase, is highly conserved among streptococcal species except for the *Streptococcus mitis* group<sup>28</sup>. Structural studies of the cell wall polysaccharides isolated from streptococcal species, including *S. mutans*, proposed that each disaccharide repeating unit of the polyrhamnose backbone is modified with glycosyl side-chains<sup>29</sup>. Previously, we have demonstrated that in the GAS, the GlcNAc side-chains of GAC are decorated with GroP<sup>28</sup>. Here, we report that the side-chains of SCC are similarly decorated by GroP in *S. mutans*. Moreover, we now demonstrate that the structural architecture of Rha-containing cell wall polysaccharides has important functional implications for regulation of cell division in streptococci.

We observe that the GroP- and Glc side-chain-deficient mutants of *S. mutans* display severely impaired cell division, as represented by a large fraction of unequally sized cells. The morphological changes are accompanied by reduced viability and enhanced susceptibility to autolysis. These intriguing phenotypes prompted a search for responsible cell division proteins and autolysins. Cell wall pulldown studies, together with co-sedimentation analysis using SCC-depleted cell walls, identified SCC as the only detectable cell wall binding receptor for AtIA. This autolysin is involved in cell separation of daughter cells after cell division, autolysis, bacterial competence, and biofilm formation in *S. mutans*<sup>31-34,45</sup>. Fluorescence anisotropy experiments conclusively demonstrate that AtIA-GFP binds to Glc- and GroP-modified SCCs, but the binding affinity for these variants is significantly lower than for those lacking the decorations. The analytical ultracentrifugation studies further revealed that all analyzed SCC variants, including the WT SCCs, interact with AtIA to form

higher-order complexes. However, modification of SCC with either GroP or the Glc side-chains reduces the extent of the protein oligomerization. We show that the AtlA N-terminal domain which is composed of Bsp repeats, targets specifically the polyrhamnose backbone of SCC. This finding allowed us to employ a fusion of the AtlA N-terminal domain with a fluorescent protein as a tool to map the topological arrangements of different SCC species within the bacterial cell wall.

Using immunofluorescent microscopy we demonstrate that AtlA and AtlA-GFP are evenly distributed along the cell surface of the mutants lacking GroP and Glc side-chains, indicating that peptidoglycan is decorated with SCCs throughout the whole cell surface of *S. mutans*. Importantly, the absence of binding of AtlA-GFP to the  $\Delta rgpG$  cells eliminates the possibility that AtlA recognizes additional structures on the bacterial surface. Finally, expression of the SCC polyrhamnose backbone is sufficient to confer AtlA binding, as demonstrated by expression in the non-natural host *E. coli*. The autolysin was found to be responsible for enhanced susceptibility to autolysis of the GroP- and Glc side-chain-deficient mutants. In newborn WT cells, AtlA is specifically targeted to cell poles, where the enzyme hydrolyzes peptidoglycan to allow daughter cell separation, and to cell equators. These observations lead to the conclusion that the mislocalization of AtlA and its strong binding to the cell wall causes the enhanced cell lysis of the mutants.

During the elongation phase, the SCC species labeled with the fluorescent AtlA fusion move from mid-cell of the parental cell, where the Z-ring is localized, toward the cell equators of the newly forming daughter cells. Subsequently, these SCCs arrive at the new division site before FtsZ. The apparent movement of the AtlA-labeled SCCs is the result of the newly synthesized cell wall being added at the septum, pushing the zone with these specific SCCs away from the cell division site. Furthermore, the AtlA-labeled SCCs co-localize with MapZ during the division cycle, indicating the presence of the distinct form of SCC in the equatorial rings. Characterization of SCCs extracted from *S. mutans* cell wall revealed a high degree of heterogeneity with a significant portion of SCC containing low or no GroP. These results, combined with the observed difference in AtlA localization

in WT versus GroP-deficient bacteria, are consistent with the idea that peptidoglycan in the equatorial rings and cell poles is decorated with newly synthesized SCCs lacking GroP modifications. Note, the results do not exclude the possibility that these SCCs are also deficient for the Glc side-chain.

The highly organized spatial distribution of the GroP-deficient SCC variants further implies that the synthesis of the equatorial rings and cell poles requires a specific modulation of the divisome and/or elongasome complexes to produce cell wall decorated with immature SCCs at the early and final stages of cell division. In line with this idea, our co-localization analysis revealed that the translocation of FtsZ from the parental septum to the equators of the daughter cells coincides with the re-appearance of the AtIA-GFP-labeled SCCs at the parental septum, suggesting that the GroP-deficient cell wall material is incorporated into the septal wall at the last step of septum closure. This observation is in agreement with the time-lapse ultrastructural reconstruction of dividing *E. faecalis* indicating that the synthesis of septum occurs in two separate events — early in the division and after the elongation phase <sup>1</sup>.

In ovococci, the peptidoglycan architecture at the equatorial rings has been proposed to direct the positioning of the cell division machinery through MapZ <sup>7,8</sup>. Our analysis of MapZ localization in the GroP-deficient mutant revealed its impaired alignment with the equatorial rings. Interestingly, a similar localization defect was observed for MapZ lacking its extracellular domain in *S. pneumoniae* <sup>7</sup>. Furthermore, we found that the delocalization of MapZ in the mutant cells causes a mis-orientation of the Z-rings, indicating that the cell shape deformations observed in the GroP-deficient mutants arise from a defect in septum placement. These findings highlight the pivotal role of GroP modification of SCC in cell division, leading to a model wherein immature SCCs, serve as landmarks for the recruitment of MapZ to equatorial rings and AtIA to equatorial rings and cell poles (Fig. 5f). Thus, this simple mechanism unifies septum positioning with its subsequent splitting. The importance of AtIA binding to equatorial rings is unclear at the moment. Early in the cell division cycle, AtIA might participate in the shaping of the new equatorial rings of the daughter cells by splitting the parental

equatorial ring (Fig. 5f). A previous report, using electron microscopy imaging, has identified the equatorial rings as the zones of autolysin activity in *E. faecalis*<sup>46</sup>. However, since the deletion of AtlA does not affect *S. mutans* cell shape, other mechanisms besides AtlA might be responsible for the generation of the daughter equatorial rings.

How MapZ recognizes cell wall decorated with immature SCCs is currently unknown but under investigation. Since MapZ homologs are also present in the species of the *S. mitis* group that do not express Rha-containing cell wall polysaccharides<sup>7,8</sup>, it suggests that, in contrast to AtlA, MapZ does not interact directly with the cell wall polysaccharides. Note, that the morphological phenotype of GroP-deficient *S. mutans* does not depend on the specific glycosyl side chain to which GroP is attached since the mutant phenotype is complemented by the plasmid-based expression of the GAC-specific side-chain. This observation suggests that a major function of GroP in streptococcal cell wall is to provide a negative charge. Phosphate groups in WTA have been proposed to affect the packing density and rigidity of the cell wall due to electrostatic repulsion between the polysaccharides<sup>47</sup>. Thus, it is possible that a cue for recognition of the equatorial ring by MapZ is an alteration in peptidoglycan density.

The Rha-containing cell wall polysaccharides are the functional homologs of canonical WTAs in streptococci because, similar to WTAs, they play significant roles in metal ion homeostasis, antimicrobial resistance<sup>28</sup>, cell division and autolysis. The exact molecular mechanism by which WTAs regulate cell division and autolysis is not known. Much like GroP modification, WTAs are required for proper localization of autolysins by restricting the binding of autolysins from the entire bacterial surface and directing them to the specific cell wall sites where they are enzymatically active<sup>13,15,17</sup>. Considering the similar function of WTAs and GroP modification of SCC, it is plausible that the here-described mechanism of the positioning of cell division proteins is widespread in Gram-positive bacteria. However, cell separation autolysins and the proteins bridging the Z-ring to cell wall likely differ between species.

## Methods

### Bacterial strains, growth conditions and media

All plasmids, strains and primers used in this study are listed in Supplementary Tables 1 and 2.

Streptococci and *E. faecalis* were grown in BD Bacto Todd-Hewitt broth supplemented with 1% yeast extract (THY) without aeration at 37°C. *S. mutans* strains were grown either on THY or brain heart infusion (BHI) agar at 37°C with 5% CO<sub>2</sub>. *E. coli* strains were grown in Lysogeny Broth (LB) medium or on LB agar plates at 37°C. When required, antibiotics were included at the following concentrations: ampicillin at 100 µg mL<sup>-1</sup> for *E. coli*; erythromycin at 5 µg mL<sup>-1</sup> for *S. mutans*; chloramphenicol at 10 µg mL<sup>-1</sup> for *E. coli* and 2 µg mL<sup>-1</sup> for *S. mutans*; spectinomycin at 500 µg mL<sup>-1</sup> for *S. mutans*; kanamycin at 300 µg mL<sup>-1</sup> for *S. mutans*.

### Construction of mutant strains

To delete *sccN*, *S. mutans* Xc chromosomal DNA was used as a template for the amplification of two DNA fragments using two primers pairs: *sccNup*-BglII-f/*sccNup*-Sall-r and *sccNdown*-BamHI-f/*sccNdown*-XhoI-r (Supplementary Table 2). The first PCR product was digested with BglII/Sall and ligated into BglII/Sall-digested pUC19BXspec<sup>30</sup>. The resultant plasmid was digested with BamHI/XhoI and used for ligation with the second PCR product that was digested with BamHI/XhoI. The resultant plasmid, pUC19BXspec-*sccN*, was digested with BglII and XhoI to obtain a DNA fragment containing the nonpolar spectinomycin resistance cassette flanked with the *sccN* upstream and downstream regions. The DNA fragment was transformed into *S. mutans* Xc by electroporation. The mutants were isolated as described below. The plasmids for the deletion of *sccP* and *atlA* were constructed using the same strategy described for *sccN* deletion with primer pairs listed in Supplementary Table 2.



To delete *rgpG* and *smaA* in the WT strain, *smaA* in the  $\Delta atIA$  and  $\Delta sccN$  backgrounds, *sccP* in the  $\Delta sccN$  background, and *atIA* in the  $\Delta sccN$  and  $\Delta sccH$  backgrounds, we used a PCR overlapping mutagenesis approach, as previously described<sup>28</sup>. Briefly, 600-700 bp fragments both upstream and downstream of the gene of interest were amplified with designed primers that contained 16-20 bp extensions complementary to the nonpolar antibiotic resistance cassette (Supplementary Table 2). The nonpolar spectinomycin, kanamycin, and erythromycin resistance cassettes were PCR-amplified from pLR16T, pOSKAR, and pHY304 (Supplementary Table 1), respectively. The two fragments of the gene of interest and the fragment with the antibiotic resistance cassette were purified using the QIAquick PCR purification kit (Qiagen) and fused by Gibson Assembly (SGA-DNA). A PCR was then performed on the Gibson Assembly sample using primers listed in Supplementary Table 2 to amplify the fused fragments.

To construct *S. mutans* strains expressing FtsZ fused at its C-terminus with a monomeric red fluorescent protein (tagRFP)<sup>48</sup>, we replaced *ftsZ* with *ftsZ-tagRFP* at its native chromosome locus. A nonpolar kanamycin resistance cassette was inserted downstream of *ftsZ-tagRFP* to allow the selection of recombinant bacteria. The fragment encoding tagRFP was PCR-amplified from pTagRFP-N (Evrogen). The fragments of *ftsZ*, *tagRFP*, kanamycin resistance cassette, and the *ftsZ* downstream region were PCR-amplified using primers listed in Supplementary Table 2, purified and assembled as described above. *S. mutans* strains expressing MapZ fused at its N-terminus with a superfolder green fluorescent protein (GFP)<sup>36</sup> were constructed similarly, except that a nonpolar spectinomycin resistance cassette followed by the GAS *mapZ* promoter was inserted upstream of the *mapZ* fusion to allow the *mapZ* expression and selection of recombinant bacteria. The fragments of the *mapZ* upstream region, spectinomycin resistance cassette, GFP, and *mapZ* were PCR-amplified using primers listed in Supplementary Table 2. The assembled PCR fragment was transformed into corresponding *S. mutans* strains by electroporation. The transformants were selected either on THY

or BHI agar containing the corresponding antibiotic. Double-crossover recombination was confirmed by PCR and Sanger sequencing using the primers listed in Supplementary Table 2.

### **Complementation of $\Delta sccN$**

To complement  $\Delta sccN$ , *sccN* was amplified from *S. mutans* Xc chromosomal DNA using primer pair *sccN*-HindIII-f/*sccN*-BglII-r, digested using HindIII/BglII, and ligated into HindIII/BglII-digested pDC123, yielding *psccN*. To replace the SCC side-chain with the GAC side-chain, a part of the GAC operon required for the addition of the GlcNAc side-chains and GroP<sup>30</sup> was expressed on pDC123 in  $\Delta sccN$ . GAS 5448 genomic DNA was used to amplify the *gacHIJKL* region using primer pairs A109-f/A101-r (Supplementary Table 2). The PCR fragment was digested using XhoI/BamHI, and ligated into XhoI/BamHI-digested pDC123, yielding *pgacHIJKL*. All plasmids were confirmed by sequencing analysis (Eurofins MWG Operon) before electroporation into *S. mutans*. We found that one *E. coli* clone carrying *pgacHIJKL* acquired a frameshift resulting in a stop codon at leucine 49 in *GacI*. The plasmid was designated *pgacHI\*JKL* and used as a negative control in our experiments. Plasmids were transformed into  $\Delta sccN$  by electroporation. Chloramphenicol resistant single colonies were picked and checked for the presence of *psccN* or *pgacHIJKL* by PCR, yielding strains  $\Delta sccN:psccN$ ,  $\Delta sccN:pgacHIJKL$  and  $\Delta sccN:pgacHI*JKL$ .

### **Construction of the plasmids for expression of AtIA-GFP, AtIA-cGFP, AtIA-tagRFP and GFP**

To create a vector for expression of the AtIA N-terminal Bsp domains fused with a superfolder GFP (AtIA-GFP fusion protein), two overlapping amplicons were generated. The first fragment encoding the N-terminal Bsp domains was amplified from *S. mutans* Xc chromosomal DNA using the primer pair *atIA\_fus*-F and *atIA\_fus*-R. The second fragment encoding GFP was amplified from pHR-scFv-GCN4-sfGFP-GB1-NLS-dWPRES (Supplementary Table 1) using the primer pair *gfp\_fus*-F and

gfp\_fus-R. The PCR products were ligated into NcoI/HindIII-digested pRSF-NT vector

(Supplementary Table 1) using Gibson assembly, resulting in pKV1527 for expression of AtIA-GFP.

To create a vector for expression of the AtIA N-terminal Bsp domains fused with colorless GFP (AtIA-cGFP fusion protein), two PCR products were amplified using primer pairs atIA\_fus-F/Y66L\_R and Y66L\_F/gfp\_fus-R, and pKV1527 as a template to introduce Y66L mutation into GFP<sup>49</sup>.

To create a vector for expression of the AtIA N-terminal Bsp domains fused with tagRFP (AtIA-tagRFP fusion protein), two PCR products were amplified using primer pairs atIA\_fus-F/atI\_tRFP\_R and tRFP\_fusF/tRFP\_fusR using *S. mutans* Xc chromosomal DNA and pTagRFP-N, respectively, as the templates. The corresponding PCR products were ligated into NcoI/HindIII-digested pRSF-NT vector using Gibson assembly resulting in pKV1556 and pKV1572.

To create a vector for expression of GFP, a PCR product was amplified using primer pair sfGFP\_BspH/gfp\_fus-R and pKV1527 as a template. The PCR product was digested with BspHI/HindIII and ligated into the NcoI/HindIII-digested pRSF-NT vector resulting in pKV1532.

### **Protein expression and purification**

To purify AtIA-GFP, AtIA-cGFP, AtIA-tagRFP and GFP, *E. coli* Rosetta (DE3) cells carrying the respective plasmids were grown in LB at 37°C to OD<sub>600</sub> = 0.4-0.6 and induced with 0.25 mM isopropyl β-D-1-thiogalactopyranoside (IPTG) at 27°C for approximately 4 hours. Bacteria were lysed in 20 mM Tris-HCl pH 7.5, 300 mM NaCl by a microfluidizer cell disrupter. The proteins were purified by Ni-NTA chromatography followed by size exclusion chromatography (SEC) on a Superdex 200 column in 20 mM HEPES pH 7.5, 100 mM NaCl.

### **Viability assay**

Exponentially growing bacteria ( $OD_{600}$  of 0.5) were pushed ten times through a 26G 3/8 syringe to break bacterial clumps. Bacteria were serially diluted in phosphate-buffered saline (PBS) and plated on THY agar for enumeration.

### **Triton X-100-induced autolysis assay**

Overnight cultures of *S. mutans* were diluted (1:100) into fresh THY broth and grown to an  $OD_{600}$  of 0.5. The autolysis assay was primarily performed, as outlined in <sup>50</sup>. Cells were allowed to autolyze in PBS containing 0.2% Triton X-100. The autolysis was monitored after 2, 4, and 21 hours as a decrease in  $OD_{600}$ . Results were normalized to the  $OD_{600}$  at time zero ( $OD_{600}$  of 0.5).

### **Isolation of cell walls and sacculi**

The cell walls were isolated from exponential phase cultures by the SDS-boiling procedure and lyophilized, as previously described <sup>30</sup>. The sacculi were obtained using the same protocol except that the bead beating step was omitted. The cell wall and sacculi were free of lipoteichoic acid (LTA), proteins, lipids, and nucleic acids.

### **Binding of AtIA-GFP to intact bacteria and cell wall material**

To study AtIA-GFP binding to intact bacteria, 10 mL of the overnight-grown bacteria were washed twice with PBS, resuspended in 1 mL of PBS, and incubated with  $0.1 \text{ mg mL}^{-1}$  AtIA-GFP for 1 hour with agitation. As a control, GFP of the same concentration was used in parallel with each experiment. Sample aliquots were assayed to determine the total fluorescence. Then samples were centrifuged (16,000 g, 3 min), and 100  $\mu\text{L}$  of the supernatant was assayed for fluorescence. To determine the fluorescence of the pellet, the supernatant fluorescence was subtracted from the total fluorescence of the sample. Controls without bacterial cells indicated that the sedimentation of AtIA-

GFP under these conditions was negligible. Data are presented as a percentage of fluorescence of the pellet normalized to the total fluorescence of the sample.

To examine AtIA-GFP binding to purified cell walls, 0.5 mg of lyophilized cell wall was incubated with 0.1 mg mL<sup>-1</sup> AtIA-GFP in 0.5 mL of PBS. The experiment was conducted as described above.

### **Pulldown of cell wall-associated proteins**

*S. mutans* (1 L) were grown to an OD<sub>600</sub> of 1.0, collected by centrifugation (5,000 g, 10 min), washed three times with PBS, and resuspended in 25 mL of urea solution (8 M urea, 20 mM Tris-HCl pH 7.5, 150 mM NaCl). The sample was rotated at room temperature for 1 hour, and then centrifuged (3,200 g, 10 min). The supernatant was dialyzed overnight at 4°C to remove urea and centrifuged again (3,200 g, 10 min). The supernatant was transferred to a fresh centrifuge tube and incubated with 10 mg of lyophilized cell wall with rotation for two hours. The cell wall was collected by centrifugation (3,200 g, 10 min) and washed three times with PBS. The proteins, retained in the cell wall, were dissolved in 0.5 mL of SDS sample buffer, and separated on 10% SDS-PAGE. Protein identification was performed at the Proteomics Core Facility (University of Kentucky) by liquid chromatography with tandem mass spectrometry (LC-MS/MS) analysis using an LTQ-Orbitrap mass spectrometer (Thermo Fisher Scientific) coupled with an Eksigent Nanoflex cHiPLC system (Eksigent) through a nanoelectrospray ionization source. The LC-MS/MS data were subjected to database searches for protein identification using Proteome Discoverer software V. 1.3 (Thermo Fisher Scientific) with a local MASCOT search engine.

### **Release of SCCs from cell wall by mild acid hydrolysis**

SCC was released from purified cell walls by mild acid hydrolysis following N-acetylation, as previously described for WTA of *Lactobacillus plantarum*<sup>51</sup> with some modifications. N-acetylation was conducted with lyophilized cell wall (4 mg) and 2 % acetic anhydride in 1 mL of saturated

NaHCO<sub>3</sub>. After incubation at room temperature overnight, the reactions were diluted with 2 vol water, and sedimented at 50,000 g, 10 min. The cell walls were further washed by resuspension with 3 mL water followed by sedimentation at 50,000 g, 10 min, three times. N-acetylated cell walls were resuspended with 0.02 N HCl (0.2 mL), and heated to 100°C for 20 min. The reactions were cooled on ice, neutralized by the addition of 4 µL 1 N NaOH, and sedimented at 50,000 g, 10 min. The supernatant fraction was removed and reserved. The pellet was resuspended in 0.2 mL water and re-sedimented. The supernatant fractions were combined and either analyzed or purified further by a combination of SEC and ion-exchange chromatography.

### **Fractionation of SCCs on DEAE-Toyopearl**

SCCs were released from purified cells walls by mild acid hydrolysis and fractionated on BioGel P150 equilibrated in 0.2 N sodium acetate, pH 3.7, 0.15 M NaCl, as previously described using BioGel P10<sup>28</sup>. The fractions containing SCCs were combined and concentrated by centrifugation over an Amicon Ultra - 15 Centrifugal Filter (KUltracel -3K). The retentate was desalted by repeated cycles of dilution with water and centrifugation. The concentrated SCCs (~0.5 mL) were applied to a 1x18 cm column of TOYOPEARL DEAE-650M (TOSOH Bioscience), equilibrated in 10 mM Tris-Cl, pH 7.4, and fractions of 2 mL were collected. After 20 fractions, the column was eluted with an 80 mL gradient of NaCl (0-0.5 M). Appropriate aliquots were analyzed for Rha and Glc by anthrone assay.

### **Derivatization of SCCs with 7-amino-1,3-naphthalenedisulfonic acid (ANDS)**

SCCs purified by a combination of SEC and ion-exchange chromatography were fluorescently tagged at the reducing end by reductive amination with ANDS as previously described<sup>52</sup>. Reaction mixtures contained 30-100 nmol of SCCs (lyophilized), 0.75 mM ANDS and 0.5 M NaCNBH<sub>4</sub> in 0.05 mL acetic acid/DMSO at 7.5/50 (%). Following overnight incubation at 37°C, the reactions were desalted by

centrifugation on an Amicon Ultra Centrifugal Filter (3,000 NMWL). Derivatized SCCs were further purified by SEC over a Superdex 75 10/300 GL column (GE Healthcare Bio-Sciences AB).

### **Glycerol and phosphate assays**

The total phosphate content of SCCs was determined by the malachite green method following digestion with perchloric acid, as previously described<sup>28</sup>. To determine glycerol, SCCs were incubated with 2 N HCl at 100°C for 2 hours. The samples were neutralized with NaOH in the presence of 62.5 mM HEPES pH 7.5. Glycerol concentration was measured using the Glycerol Colorimetric assay kit (Cayman Chemical) according to the manufacturer's protocol.

### **Modified anthrone assay**

Total Rha and Glc contents were estimated using a minor modification of the anthrone procedure. Reactions contained 0.08 mL of aqueous sample and water and 0.32 mL anthrone reagent (0.2 % anthrone in concentrated H<sub>2</sub>SO<sub>4</sub>). The samples were heated to 100°C, 10 min, cooled in water (room temperature), and the absorbance at 580 nm and 700 nm was recorded. The chromophore produced from Rha has a relatively discreet absorbance maximum and is essentially zero at 700 nm. The absorbance of the Glc chromophore at 700 nm is approximately equal to its absorbance at 580 nm. Therefore the contribution of Glc to the absorbance at 580 nm can be estimated from its absorbance at 700 nm and subtracted from the absorbance at 580 nm to obtain the Rha-specific signal. Rha and Glc concentrations were estimated using L-Rha and D-Glc standard curves, respectively.

### **Glycosyl composition analysis**

Glycosyl composition analysis of SCC samples was performed at the Complex Carbohydrate Research Center (University of Georgia, Athens, GA) by combined gas chromatography/mass spectrometry (GC-MS) of the per-O-trimethylsilyl derivatives of O-methyl glycosides of the

monosaccharides produced by acidic methanolysis as described previously<sup>30</sup>. Likewise, a similar assay was performed following in-house pretreatment with HF, as described below. Appropriate aliquots were supplemented with 2 nmol inositol (internal standard), taken to dryness, and incubated with 25  $\mu$ L 51% HF, 4°C, 16 hours. Following HF treatment, the samples were evaporated under a stream of air (the evaporating HF was captured by bubbling through a trap containing 1 M KOH), dissolved in water, transferred to screw-cap tubes equipped with Teflon lined caps and dried again. 0.2 mL 1 N HCl in methanol (formed by the drop-wise addition of acetyl chloride into rapidly-stirring anhydrous methanol) was added, the tubes were tightly sealed and incubated at 80°C, 16 hours. Following methanolysis, the reactions were neutralized with ~3-5 mg AgCO<sub>3</sub>, centrifuged, and the supernatant transferred to a fresh tube. To re-N-acetylate amino sugars, the samples were taken to dryness under a stream of air, evaporated out of 0.5 mL of methanol, and re-dissolved in 0.1 mL of methanol containing 10 % pyridine and 10 % acetic anhydride. The reactions were dried, trimethylsilylated with 25  $\mu$ L Tri-Sil TH (Sigma Aldrich), and analyzed by methane chemical ionization GC-MS using a Thermo ISQ mass spectrometer interfaced with a gas chromatograph, equipped with a 15 m Equity 1701 glass capillary column and helium carrier gas.

### **GlcNAc analysis**

GlcNAc content was assayed using the Megazyme Glucosamine Assay Kit according to the manufacturer's instructions with some minor modifications. Partially purified polysaccharide (~40-60 nmol Rha) was hydrolyzed in 40  $\mu$ L 2 N HCl, 100°C, 2 hours, neutralized with 10 N NaOH (to ~pH 7.0 by pH paper) and adjusted to a final volume of 50  $\mu$ L with water. The acid hydrolysis de-acetylates GlcNAc to generate glucosamine. An aliquot (5  $\mu$ L) of the neutralized hydrolysate was diluted with 171  $\mu$ L water and mixed with a total of 24  $\mu$ L of Megazyme Glucosamine Assay Kit Enzyme Mix. Absorbance at 340 nm was recorded after incubation at room temperature for 40 min. Glucosamine



content was determined by comparison with a glucosamine standard curve and verified by comparison with GlcNAc standards treated similarly as the polysaccharide.

### **FACS analysis**

AtIA-GFP (5  $\mu$ L, 3.8 mg mL<sup>-1</sup>) or GFP (5  $\mu$ L, 3.5 mg mL<sup>-1</sup>) were added to 100  $\mu$ L of *E. coli* CS2775<sup>41</sup> or PHD136 [*E. coli* CS2775 harboring pRGP1 plasmid<sup>41</sup>] (OD<sub>600</sub> = 0.4). After 20 minutes of incubation on ice, the cells were centrifuged at 20,800 g, 5 min. The pellet was washed twice with PBS, resuspended in PBS, fixed with paraformaldehyde (4% final concentration), 4°C, 20 min, and then washed once with PBS. The cells were resuspended in 0.3% BSA in PBS and immediately analyzed by flow cytometry (BD LSRFortessa). Anti-GAC antibodies conjugated with FITC (ABIN238144, antibodies-online, titer 1:50) were used as a positive control to confirm polyrhamnose expression in *E. coli* strain PHD136. The FACS data were analyzed using flowJo version 10.

### **Scanning electron microscopy (SEM)**

Exponentially growing bacteria (OD<sub>600</sub> of 0.7) were harvested by centrifugation (3,200 g, 10 min), washed once with 20 mM HEPES, 0.5% BSA buffer (pH 8.0), resuspended in PBS, fixed with paraformaldehyde (4% final concentration), 4°C, 15 min, and then pipetted onto microscope slide cover glasses coated with poly-L-lysine. Following one hour incubation, the cover glasses were washed 3 times with PBS. Bacteria were dehydrated stepwise in a gradient series of ethanol (35%, 50%, 70%, and 96% for 20 min each and then 100% overnight), followed by critical point drying with liquid CO<sub>2</sub> in a Leica EM CPD300. Samples were coated with about 5 nm of platinum controlled by a film-thickness monitor. SEM images were performed in the immersion mode of an FEI Helios Nanolab 660 dual beam system.

### **Fluorescent and differential interference contrast (DIC) microscopy**

To determine the bacterial regions targeted by AtIA-GFP and AtIA-tagRFP, we utilized fluorescent microscopy. Exponentially growing bacteria ( $OD_{600}$  of 0.7) were fixed with paraformaldehyde (4% final concentration), 4°C, 15 min, pipetted onto microscope slide cover glasses coated with poly-L-lysine, and allowed to settle for one hour at room temperature. Bacteria were incubated with AtIA-GFP or AtIA-tagRFP ( $20 \mu\text{g mL}^{-1}$ ) for 15 min at room temperature. As a control, GFP of the same concentration was used in parallel with each experiment. The samples were washed four times with PBS, dried at room temperature, and mounted on a microscope slide with ProLong Diamond Antifade Kit with DAPI (Invitrogen). Samples were imaged on a Zeiss LSM 880 using Airyscan mode and a Leica SP8 equipped with 100X, 1.44 N.A. objective, DIC optics, and “lightning” post-processing. Images were processed with Airyscan processing and the “lightning” processing tool, respectively. Samples with *S. mutans* cells expressing MapZ-GFP and FtsZ-tagRFP were prepared similarly. They were imaged on a Leica SP8. Images were deconvolved using Huygens Professional software.

Immunofluorescent microscopy was used to monitor AtIA on the cell surface of *S. mutans*. Exponentially growing bacteria ( $OD_{600}$  of 0.8) were fixed with 2.5% (v/v) paraformaldehyde, 0.03% glutaraldehyde in 30 mM phosphate buffer (pH 8.0), transferred onto poly-L-lysine coated cover glasses and incubated at room temperature for one hour. The samples were washed three times with PBS and incubated in buffer containing 20 mM Tris-HCl pH 7.5, 10 mM EDTA, 50 mM Glc, and lysozyme ( $0.1 \text{ mg mL}^{-1}$ ) for 30 min. After washing twice with PBS, the samples were air-dried, and dipped in cold methanol, -20°C, 5 min. The samples were blocked with 2% (w/v) bovine serum albumin in PBS (BSA-PBS), room temperature, 2 hours, and incubated with polyclonal anti-AtIA antibodies<sup>33</sup> (1:600) in BSA-PBS, 4°C, overnight. The samples were then washed 15 min five times with PBS+0.1% Tween-20 (PBST) buffer and incubated with Alexa Fluor 488-conjugated goat anti-rabbit antibodies (1:100) in BSA-PBS, room temperature, 2 hours. After extensive washing with PBST buffer, the specimens were air-dried and assembled on microscope slides mounted with ProLong Diamond Antifade Kit with DAPI. Micrographs were taken on a Leica SP8 confocal microscope.

To determine the length and width of cells, exponentially growing bacteria (OD<sub>600</sub> of 0.7) were imaged on a Leica SP8 confocal microscope. ImageJ software was used to measure the sizes of cells.

### Fluorescence anisotropy

Reactions (150  $\mu$ L) containing 0.5  $\mu$ M ANDS-labeled polysaccharide and 0-10  $\mu$ M AtIA-cGFP were incubated at room temperature for 30 minutes in 20 mM Tris 7.5, 300 mM NaCl. The anisotropy was then measured on a Fluoromax-4 (Horiba) photon-counting steady-state fluorometer at 25°C using an excitation wavelength of 310 nm and the following emission at 450 nm with slit widths of 5 nm and an integration time of 1 second. All measurements are an average of three independent replicates.

Curves terminate at 10  $\mu$ M of AtIA-cGFP due to aggregation issues at higher protein concentration.

The single-site total binding equation in Graphpad Prism 8 was used to fit the binding of the polysaccharide isolated from the  $\Delta sccN\Delta sccP$  mutant. Lower-bound estimates of the  $K_d$  for the other three SCC species were determined by fitting to the binding equation after fixing the maximal binding limit,  $B_{max}$ , to that of  $\Delta sccN\Delta sccP$ .

### Analytical ultracentrifugation

Sedimentation velocity (SV) experiments were performed in a Beckman ProteomeLab XL-I at 20°C using absorbance optics at 278 nm in an An-60Ti rotor at 32,000 rpm until complete sedimentation of sample occurred. The analysis was conducted using Sedfit 16.1c<sup>53,54</sup> using the  $c(s)$  data model and expressed using sedimentation coefficient distributions. Each fit rmsd was 0.005 or lower. GUSI 1.4.1<sup>55</sup> was used for data visualization. SV data were also fitted using Wide Distribution Analysis (WDA) in SedAnal v7.11<sup>56</sup>. WDA distributions were computed from 6.10 cm to 7.00 cm with an increment of 0.01 cm. The radial range plotted was 6.40 - 6.60 cm in 0.01 cm increments, with a 2% smoothing algorithm applied (equivalent to 4 scans). The weight-average sedimentation coefficient

(sw) was computed using a range of 2-100 S. Partial specific volume ( $v\text{-bar}$ ) was  $0.725 \text{ ml g}^{-1}$ , and the solution density ( $\rho$ ) was  $0.998 \text{ g mL}^{-1}$ .

## Statistical analysis

Unless otherwise indicated, statistical analysis was carried out on pooled data from at least three independent biological repeats. Statistical analysis of data was performed using one-way ANOVA, 2-way ANOVA, and two-tailed Student's t-test as described for individual experiments. A *P*-value equal to or less than 0.05 was considered statistically significant.

## Data availability

All data generated during this study are included in the article and supplementary information files or will be available from the corresponding author upon reasonable request.

## Acknowledgments

The authors thank Dr. Sang-Joon Ahn (University of Florida) for the kind gift of anti-AtIA antibodies, Dr. John F. Timoney (University of Kentucky) and Dr. Johannes Huebner (von Hauner Children's Hospital, LMU) for providing *S. equi* and *E. faecalis*, respectively, Dr. Jeffrey M. Bosken and Dr. Edward D. Hall (University of Kentucky) for the use of the Thermo Scientific GC-MS instrument and Dr. Catalina Velez-Ortega (University of Kentucky) for the access to Leica SP8 confocal microscope.

This work was supported by NIH grants R56 AI135021 from the NIAID and R01 DE028916 from the NIDCR (to NK), R01 GM094363 from the NIGMS (to ABH) and R01 DC014658 from the NIDCD (to GIF), Tenovus Scotland Large Research Grant T17/17 and University of Dundee Wellcome Fund 105606/Z/14/Z (to SAC and HCD), Wellcome and Royal Society Grant 109357/Z/15/Z (to HCD).

Scanning electron microscopy was performed at the Electron Microscopy Center, which belongs to the National Science Foundation NNCI Kentucky Multiscale Manufacturing and Nano Integration

Node, supported by ECCS-1542174. Carbohydrate composition analysis at the Complex

Carbohydrate Research Center was supported by the Chemical Sciences, Geosciences and Biosciences Division, Office of Basic Energy Sciences, U.S. Department of Energy grant (DE-FG02-93ER20097) to Parastoo Azadi. The funders had no role in study design, data collection and interpretation, or the decision to submit the work for publication.

### **Author contributions**

SZ, CTC, JSR, SAC, AEY, ABH, NMvS, HCD, GIF, KVK, and NK designed the experiments. SZ, CTC, JSR, SAC, AEY, HCD, KVK, and NK performed functional and biochemical experiments. SZ and GIF performed microscopy analysis. NK, KVK, and NMvS constructed plasmids and isolated mutants. SZ, CTC, JSR, SAC, AEY, ABH, HCD, KVK, and NK analyzed the data. NK wrote the manuscript with contributions from all authors. All authors reviewed the results and approved the final version of the manuscript.

### **Competing interests**

The authors declare no competing interests.

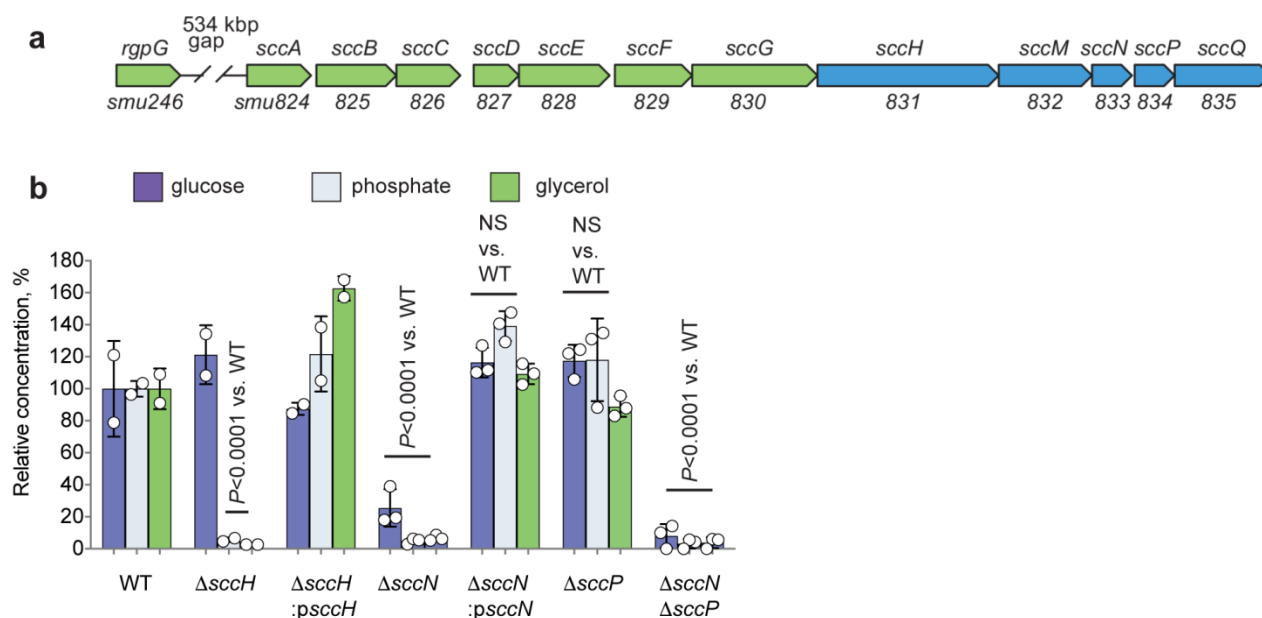

**Fig. 1. Modification of the SCC polyrhamnose backbone with Glc side-chains and GroP.**

(a) Schematic representation of the SCC biosynthetic gene cluster. SCC gene cluster *smu.824-835* was renamed *sccABCDEFGHIHMNPQ*<sup>28</sup>. (b) Composition analysis of SCCs isolated from *S. mutans* WT,  $\Delta sccH$ ,  $\Delta sccH:psscH$ ,  $\Delta sccN$ ,  $\Delta sccN:psscN$ ,  $\Delta sccP$ , and  $\Delta sccN\Delta sccP$ . The concentrations of Glc, phosphate, and glycerol are normalized to Rha content and presented as a percentage of the ratios in the WT strain. Glc was analyzed by GC-MS. Phosphate and glycerol were analyzed by colorimetric assays. Columns and error bars represent the mean and S.D., respectively (biologically independent replicates for  $\Delta sccN$ ,  $\Delta sccN:psscN$ ,  $\Delta sccP$ , and  $\Delta sccN\Delta sccP$  were three, and for WT,  $\Delta sccH$ ,  $\Delta sccH:psscH$  were two). *P* values were calculated by 2-way ANOVA with Bonferroni's multiple comparison test.

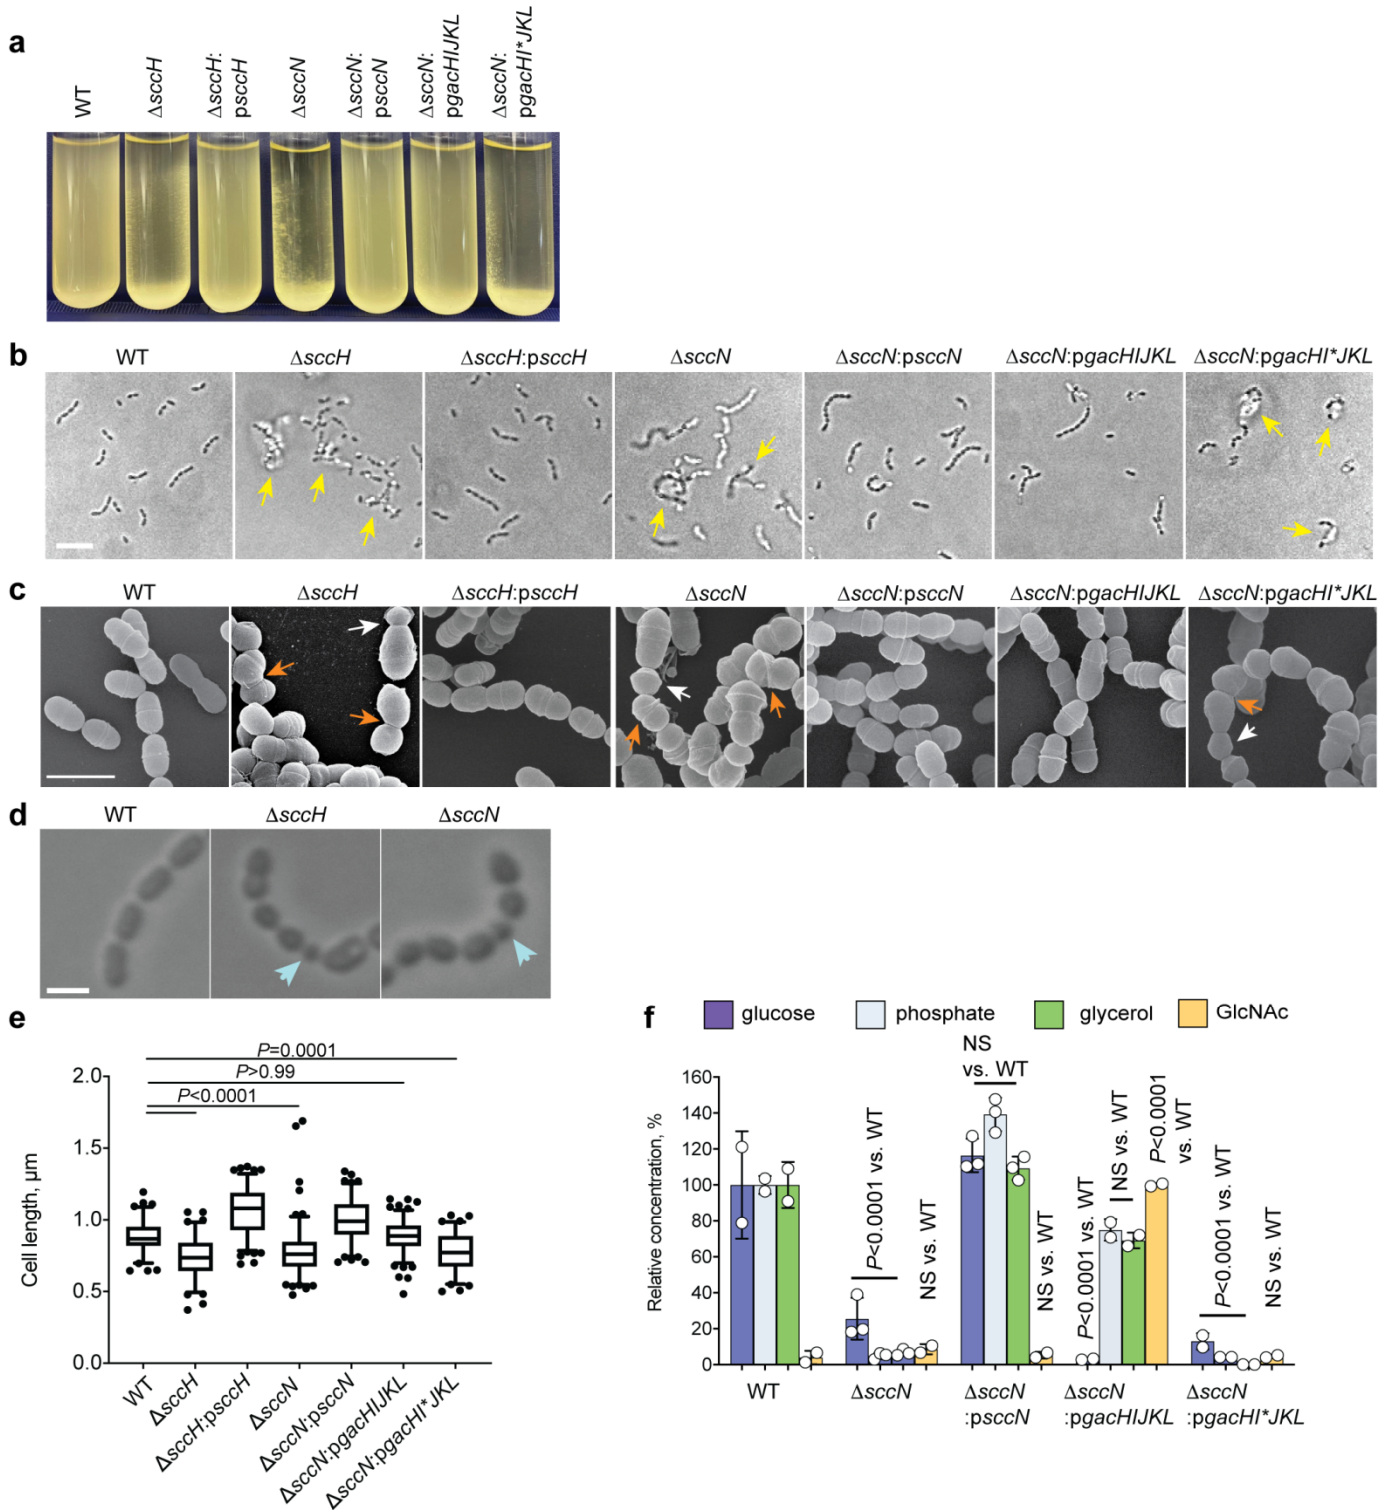

**Fig. 2. GroP modification of SCC controls the cell aggregation and morphology of *S. mutans*.**

(a) Sedimentation phenotype of *S. mutans* WT and specific mutants after overnight growth in THY broth. (b) Differential interference contrast (DIC) images of bacteria grown in THY broth overnight. Yellow arrows indicate bacterial aggregates. Scale bar is 5  $\mu\text{m}$ . (c and d) Morphological defects of

*S. mutans* deficient in GroP and glycosyl side-chain decorations. **(c)** Scanning electron micrographs of *S. mutans* WT and specific mutants. Exponentially growing bacteria were fixed, dehydrated stepwise, and viewed by scanning electron microscopy. White and orange arrows denote small round cells and the cells with skewed division planes, respectively. **(d)** DIC images of exponentially growing bacteria. Blue arrows denote small round cells. Representative images from at least three independent experiments are shown in **a**, **b**, **c** and **d**. Scale bar is 1  $\mu\text{m}$  in **c** and **d**. **(e)** Cell length of bacterial strains at the mid-exponential phase. DIC images of bacterial cells were analyzed using the software ImageJ to quantify cell length and width. *P*-values were determined by one-way ANOVA for on ranks with Dunn's test. **(f)** Composition analysis of polysaccharides isolated from *S. mutans* WT,  $\Delta sccN$ ,  $\Delta sccN:psscN$ ,  $\Delta sccN:pgacHIJKL$  and  $\Delta sccN:pgacHI*JKL$ . The concentrations of Glc, phosphate, and glycerol are normalized to Rha content and presented relative to the WT strain. The concentration of GlcNAc is normalized to Rha content and presented relative to  $\Delta sccN:pgacHIJKL$ . Glc was analyzed by GC-MS. Phosphate, glycerol, and GlcNAc were analyzed by colorimetric assays. Results of GlcNAc analysis were confirmed by GC-MS. Columns and error bars represent the mean and S.D., respectively ( $n = 2$  biologically independent replicates were for  $\Delta sccN:pgacHIJKL$  and  $\Delta sccN:pgacHI*JKL$ , and GlcNAc content in all strains). Glc, phosphate, and glycerol contents in *S. mutans* WT,  $\Delta sccN$ , and  $\Delta sccN:psscN$  as in Fig 1 b. *P* values were calculated by 2-way ANOVA with Bonferroni's multiple comparison test.



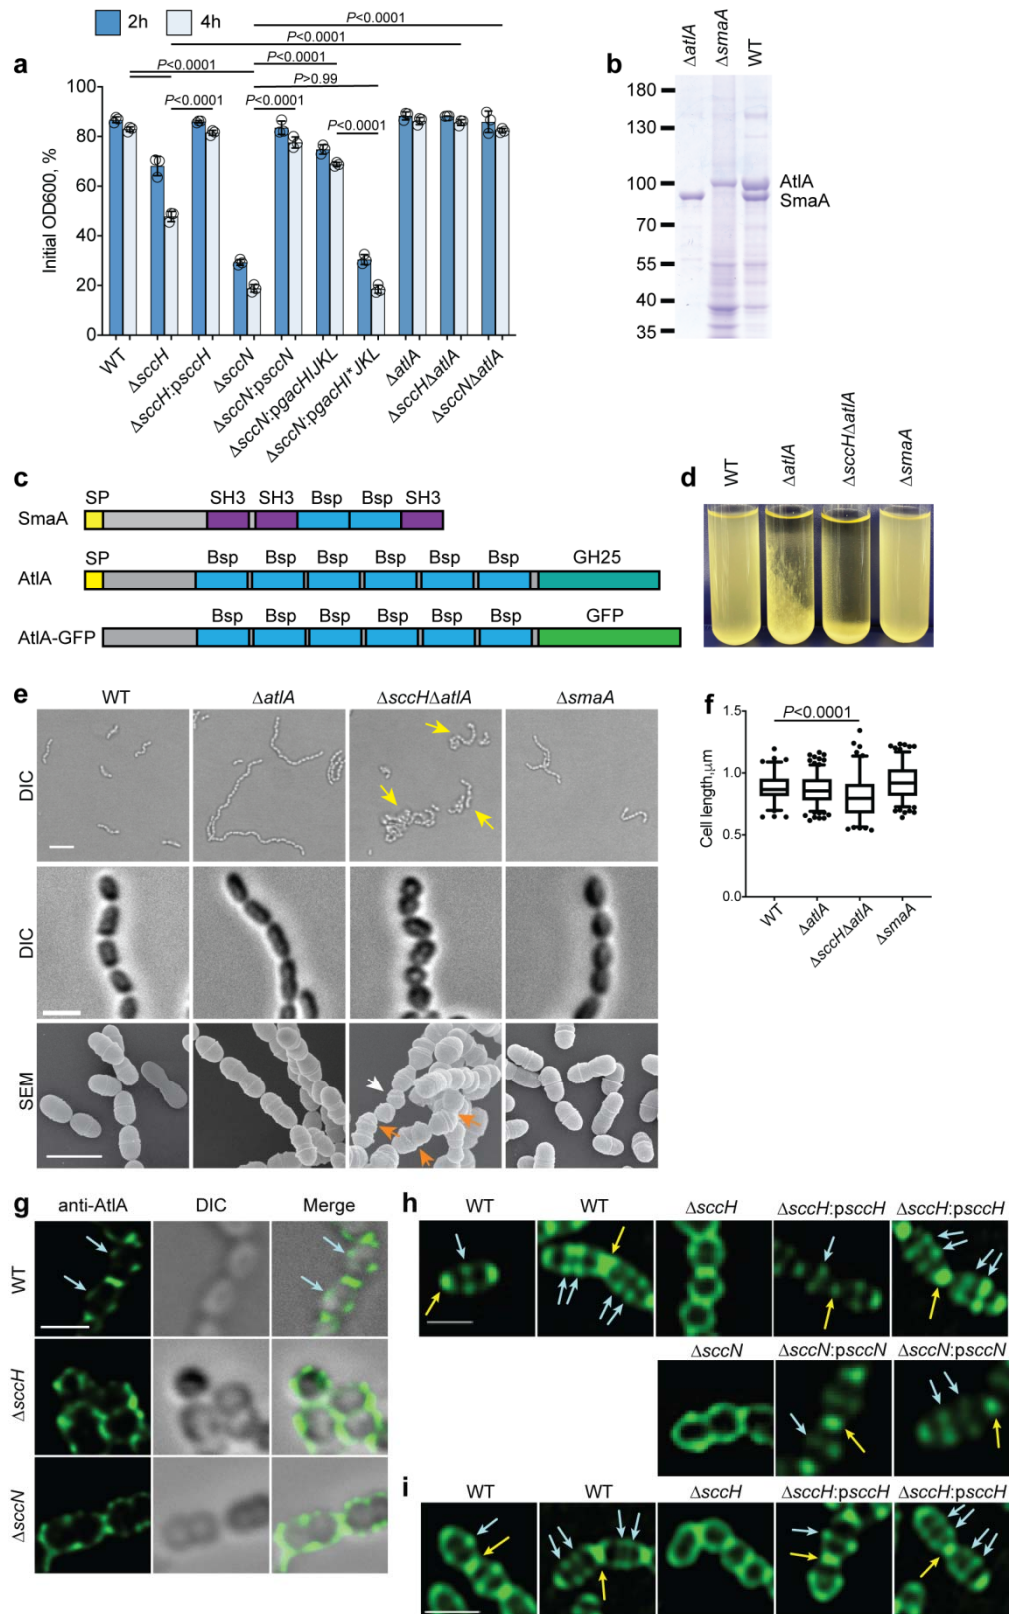

**Fig. 3. AtIA mediates autolysis of the *S. mutans* mutants lacking GroP and the side-chain in SCC.**

(a) The autolytic activity of *S. mutans* WT,  $\Delta sccH$ ,  $\Delta sccH:psscH$ ,  $\Delta sccN$ ,  $\Delta sccN:psscN$ ,  $\Delta sccN:pgacHIJKL$   $\Delta sccN:pgacHI^*JKL$ ,  $\Delta atlA$ ,  $\Delta sccH\Delta atlA$  and  $\Delta sccN\Delta atlA$ . Exponentially growing strains were allowed to autolyze in 0.1% Triton X-100. The autolysis was monitored after 2 and 4 h as the decrease in OD<sub>600</sub>. Results were normalized to the OD<sub>600</sub> at time zero (OD<sub>600</sub> of 0.5). Columns and error bars represent the mean and S.D., respectively (n = 3 biologically independent replicates). *P*-values were determined by two-way ANOVA with Tukey's multiple comparisons test. (b) A pulldown of WT,  $\Delta atlA$ , and  $\Delta smaA$  cell surface proteins using the cell wall purified from *S. mutans*. AtIA and SmaA were identified as proteins bound to the cell wall. Cell surface proteins were extracted from WT,  $\Delta atlA$ , and  $\Delta smaA$  with 8 M urea, refolded overnight, and incubated with the lyophilized cell wall purified from *S. mutans* WT. Bound proteins were extracted with SDS sample buffer and separated on 10% SDS-PAGE. Representative image from at least three independent experiments is shown. (c) Diagram of the domain structure of SmaA, AtIA and AtIA-GFP. SP (yellow box) denotes signal peptide. (d) The growth phenotype of WT,  $\Delta atlA$ ,  $\Delta sccH\Delta atlA$  and  $\Delta smaA$ . Bacteria were grown in THY broth overnight. (e) Differential interference contrast (DIC) images of bacteria grown in THY broth overnight (top panels, scale bar is 5  $\mu$ m) and exponentially growing bacteria (middle panels, scale bar is 1  $\mu$ m). Yellow arrows indicate bacterial aggregates. Scanning electron micrographs of WT,  $\Delta atlA$ ,  $\Delta sccH\Delta atlA$  and  $\Delta smaA$  (bottom panels, scale bar is 1  $\mu$ m). Exponentially growing bacteria were fixed, dehydrated stepwise, and viewed by scanning electron microscopy. White and orange arrows denote small round cells and the cells with skewed division plane, respectively. (f) Cell length of bacterial strains at the mid-exponential phase. DIC images of bacterial cells were analyzed using the software ImageJ to quantify cell length and width. *P*-values were determined by one-way ANOVA for on ranks with Dunn's test. (g) Immunolocalization of AtIA on the surface of WT,  $\Delta sccH$ , and  $\Delta sccN$  cells. Cells were grown to mid-log phase, immunostained with anti-AtIA antibodies, and examined by differential interference contrast (DIC) (center panels) and fluorescence microscopy (left panels). An overlay of AtIA immunostaining and DIC is shown in the right panels. Blue arrows depict

equatorial sites labeled by AtIA-GFP. **(h)** Binding of AtIA-GFP to exponentially growing WT,  $\Delta sccH$ ,  $\Delta sccH:psscH$ ,  $\Delta sccN$  and  $\Delta sccN:psscN$  cells. Yellow and blue arrows show polar and equatorial sites, respectively, labeled by AtIA-GFP. **(i)** Binding of AtIA-GFP to sacculi of WT,  $\Delta sccH$  and  $\Delta sccH:psscH$ . Scale bar is 1  $\mu\text{m}$  in **g**, **h**, and **i**. The experiments depicted in **b**, **d**, **e**, **g**, **h**, and **i** were performed independently three times and yielded the same results.

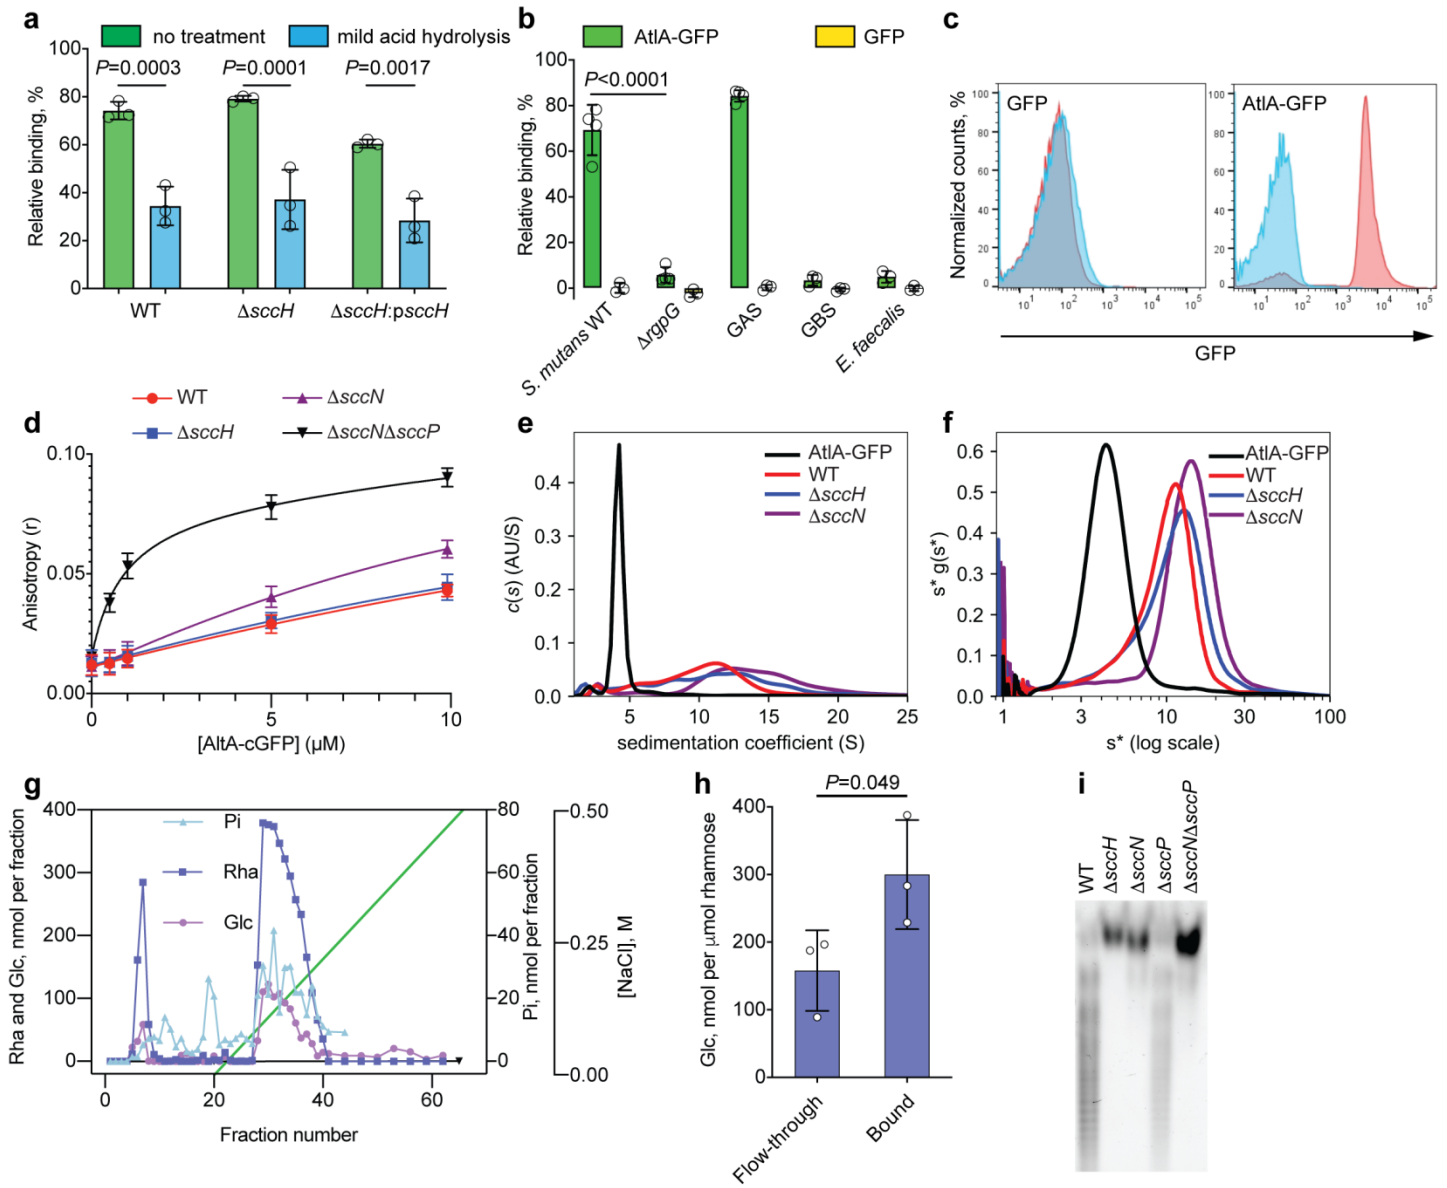

**Fig. 4. AtIA-GFP binds to the polyhamnose backbone of SCC.**

(a) Binding of AtIA-GFP to *S. mutans* cell wall requires intact SCC. Co-sedimentation assay of AtIA-GFP with cell walls purified from WT,  $\Delta sccH$  and  $\Delta sccH:pscH$ . The protein fusion was incubated with intact cell walls (no treatment) or the cell walls subjected to mild acid hydrolysis to cleave SCCs from peptidoglycan (mild acid hydrolysis). The efficiency of SCC release from cell walls is shown in Supplementary Figure 9a. (b) Co-sedimentation assay of AtIA-GFP and GFP with cell walls purified from *S. mutans* WT,  $\Delta rgpG$ , GAS, *S. equi*, GBS and *E. faecalis*. Data in a and b are presented as a percentage of fluorescence of the pellet normalized to the total fluorescence of the sample. Columns and error bars represent the mean and S.D., respectively ( $n = 3$  biologically independent replicates).

*P* values were calculated by a two-way ANOVA with Tukey's multiple comparisons test. **(c)** AtIA-GFP binds to *E. coli* expressing polyrhamnose on the cell surface. Flow cytometry analysis of AtIA-GFP (right panel) and GFP (left panel) binding to the polyrhamnose-expressing *E. coli* (red) and its parental strain (blue). For flow cytometric analysis, at least 10000 events were collected. Experiments depicted in **c** were performed independently three times and yielded the same results. Histograms of representative results are shown. **(d)** Fluorescence anisotropy of 0.5  $\mu$ M ANDS-labeled SCC variants incubated with titrations of AtIA-cGFP. Binding of the  $\Delta sccN\Delta sccP$  SCC to AtIA-GFP was fitted to a one-site total-binding model. Error bars represent the 95% confidence interval of three independent replicates. **(e and f)** Analytical ultracentrifugation analysis of AtIA-GFP binding to SCCs extracted from WT,  $\Delta sccH$  and  $\Delta sccN$ . **(e)** The continuous  $c(s)$  distributions for 2.5  $\mu$ M AtIA-GFP combined with 25  $\mu$ M SCC variants. **(f)** Plot of  $s^*g(s^*)$  vs.  $\log(s^*)$  using wide distribution analysis in SedAnal. Experiments depicted in **e** and **f** were performed independently twice and yielded the same results. **(g)** Ion exchange chromatography of SCCs purified from WT *S. mutans*. SCC material was loaded onto Toyopearl DEAE-650M and eluted with a NaCl gradient (0-0.5 M). Fractions were analyzed for Rha and Glc contents by anthrone assay and total phosphate (Pi) content by malachite green assay following digestion with perchloric acid. The experiments were performed at least three times and yielded the same results. Data from one representative experiment are shown. **(h)** Composition analysis of minor and major fractions from **g**. Fractions were pooled, concentrated, and desalted by spin column and analyzed by GC-MS to determine the Rha and Glc concentrations. The concentration of Glc is presented relative to the Rha concentration. Columns and error bars represent the mean and S.D., respectively ( $n = 3$  biologically independent replicates). *P* values were calculated by a two-tailed t-test. **(i)** SDS-PAGE analysis of ANDS-labeled SCCs extracted from *S. mutans* mutants. Representative image from at least three independent experiments is shown.

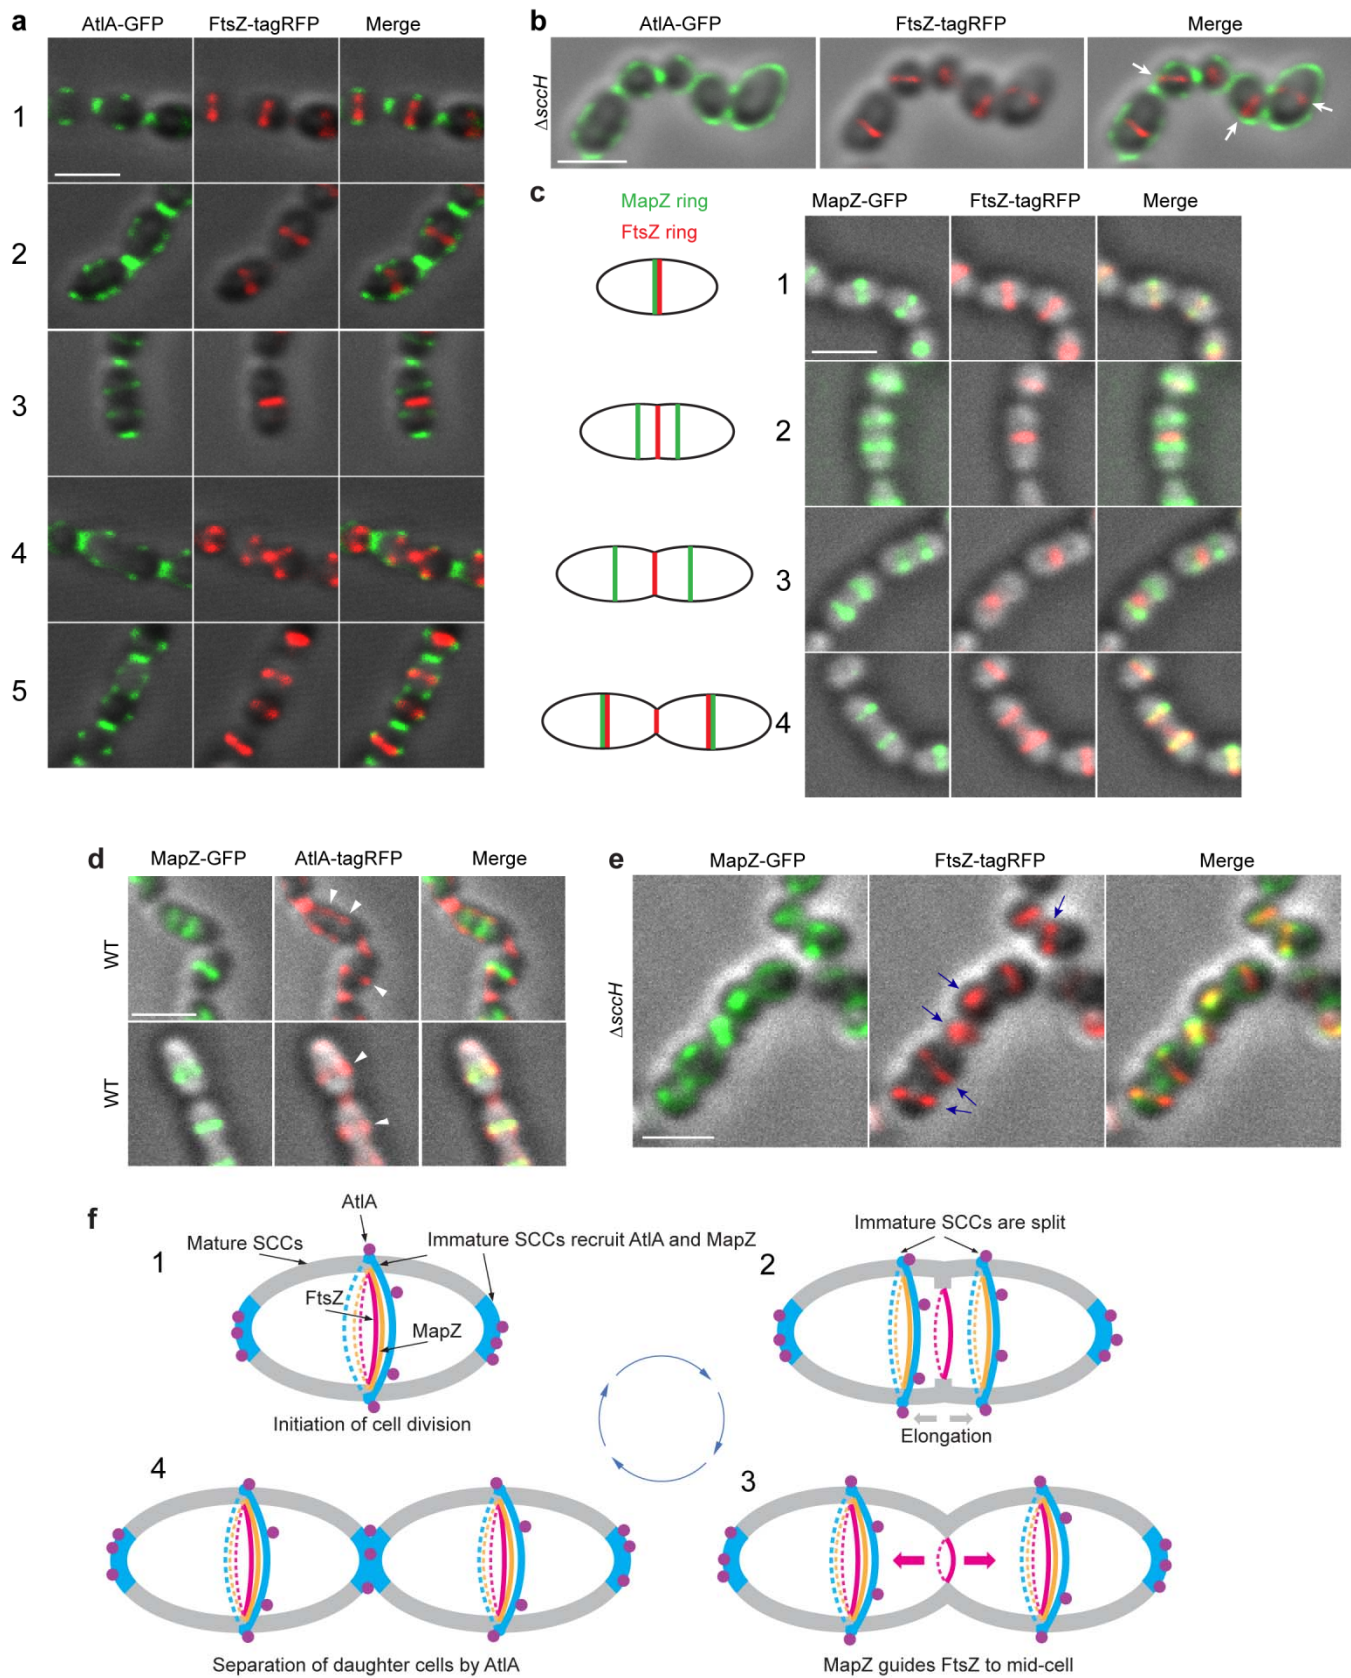

**Fig. 5. GroP modification of SCC controls the positioning of FtsZ- and MapZ-rings.**

**(a)** Localization of FtsZ in WT (strain *ftsZ-tagRFP*) cells at different stages of the cell cycle (designated 1 to 5). Images depict cells expressing FtsZ-tagRFP (red) labeled by AtIA-GFP protein (green). **(b)** Localization of FtsZ in  $\Delta sccH$  (strain  $\Delta sccH ftsZ-tagRFP$ ) cells. Cells expressing FtsZ-tagRFP (middle panel, red) labeled with AtIA-GFP protein (left panel, green) were analyzed. An overlay of DIC, GFP, and tagRFP signals is shown in the far-right panel (merge). White arrows indicate mislocalized Z-rings. **(c)** Localization of MapZ (left panels, green) and FtsZ (middle panels, red) in WT (strain *ftsZ-tagRFP mapZ-GFP*) cells at different stages of cell cycle designated 1 to 4). WT cells expressing MapZ-GFP and FtsZ-tagRFP were analyzed. Schematic pictures (left panel) illustrate MapZ- and FtsZ-ring positions during different stages of the cell cycle. **(d)** Localization of MapZ (left panels, green) and SCCs labeled with AtIA-tagRFP protein (middle panels, red) in WT (strain *mapZ-GFP*) cells. White arrowheads depict the positions of equatorial SCCs labeled with AtIA-tagRFP. **(e)** Localization of MapZ (left panel, green) and FtsZ (middle panel, red) in  $\Delta sccH$  (strain  $\Delta sccH ftsZ-tagRFP mapZ-GFP$ ) cells. Blue arrows indicate mislocalized Z-rings. Images are overlays of DIC and fluorescence images in **a**, **b**, **c**, **d** and **e**. An overlay of DIC, GFP, and tagRFP signals is shown in right panels in **a**, **c**, **d** and **e**. Scale bar is 1  $\mu\text{m}$  in **a**, **b**, **c**, **d** and **e**. Representative images from at least three independent experiments are shown in **a**, **b**, **c**, **d** and **e**. **(f)** A schematic model of cell division in *S. mutans*. **1.** Cell division is initiated at mid-cell by recruitment and alignment of the FtsZ-ring with the equatorial ring. This process is guided by the MapZ-ring, which is recruited to mid-cell by immature SCCs present in the equatorial ring. AtIA binds to immature SCCs enriched in the cell poles and equatorial ring. **2.** Cell division machinery assembled at mid-cell synthesizes the first part of the septal wall. Concomitantly with this process, the equatorial ring is split in the middle presumably under turgor pressure and due to AtIA action. Synthesis of the lateral walls decorated with mature SCCs begins resulting in migration of new equatorial rings apart. The MapZ-rings follow the equatorial ring. **3.** The equatorial rings approach the equator of new daughter cells. MapZ guides FtsZ recruitment to new equatorial rings. **4.** Cell division machinery synthesizes the polar septal wall

decorated with immature SCCs. AtIA is recruited to newly forming poles to separate the daughter cells. Cell walls decorated with mature and immature SCCs are shown in gray and blue, respectively. Purple circles indicate AtIA. FtsZ- and MapZ-rings are shown in red and orange colors, respectively.



## References

1. Higgins, M.L. & Shockman, G.D. Model for cell wall growth of *Streptococcus faecalis*. *J Bacteriol* **101**, 643-648 (1970).
2. Land, A.D. & Winkler, M.E. The requirement for pneumococcal MreC and MreD is relieved by inactivation of the gene encoding PBP1a. *Journal of bacteriology* **193**, 4166-4179 (2011).
3. Sham, L.T., Tsui, H.C., Land, A.D., Barendt, S.M. & Winkler, M.E. Recent advances in pneumococcal peptidoglycan biosynthesis suggest new vaccine and antimicrobial targets. *Curr Opin Microbiol* **15**, 194-203 (2012).
4. Wheeler, R., Mesnage, S., Boneca, I.G., Hobbs, J.K. & Foster, S.J. Super-resolution microscopy reveals cell wall dynamics and peptidoglycan architecture in ovococcal bacteria. *Mol Microbiol* **82**, 1096-1109 (2011).
5. Massidda, O., Novakova, L. & Vollmer, W. From models to pathogens: how much have we learned about *Streptococcus pneumoniae* cell division? *Environ Microbiol* **15**, 3133-3157 (2013).
6. van Raaphorst, R., Kjos, M. & Veening, J.W. Chromosome segregation drives division site selection in *Streptococcus pneumoniae*. *Proc Natl Acad Sci U S A* **114**, E5959-E5968 (2017).
7. Fleurie, A. et al. MapZ marks the division sites and positions FtsZ rings in *Streptococcus pneumoniae*. *Nature* **516**, 259-262 (2014).
8. Holeckova, N. et al. LocZ is a new cell division protein involved in proper septum placement in *Streptococcus pneumoniae*. *mBio* **6**, e01700-01714 (2014).
9. Perez, A.J. et al. Movement dynamics of divisome proteins and PBP2x:FtsW in cells of *Streptococcus pneumoniae*. *Proc Natl Acad Sci U S A* **116**, 3211-3220 (2019).

10. Li, Y. et al. MapZ Forms a Stable Ring Structure That Acts As a Nanotrack for FtsZ Treadmilling in *Streptococcus mutans*. *ACS Nano* **12**, 6137-6146 (2018).
11. Manuse, S. et al. Structure-function analysis of the extracellular domain of the pneumococcal cell division site positioning protein MapZ. *Nat Commun* **7**, 12071 (2016).
12. Brown, S., Santa Maria, J.P., Jr. & Walker, S. Wall teichoic acids of Gram-positive bacteria. *Annu Rev Microbiol* **67**, 313-336 (2013).
13. Yamamoto, H., Miyake, Y., Hisaoka, M., Kurosawa, S. & Sekiguchi, J. The major and minor wall teichoic acids prevent the sidewall localization of vegetative DL-endopeptidase LytF in *Bacillus subtilis*. *Mol Microbiol* **70**, 297-310 (2008).
14. Schirner, K., Marles-Wright, J., Lewis, R.J. & Errington, J. Distinct and essential morphogenic functions for wall- and lipo-teichoic acids in *Bacillus subtilis*. *EMBO J* **28**, 830-842 (2009).
15. Schlag, M. et al. Role of staphylococcal wall teichoic acid in targeting the major autolysin Atl. *Mol Microbiol* **75**, 864-873 (2010).
16. Lunderberg, J.M., Liszewski Zilla, M., Missiakas, D. & Schneewind, O. Bacillus anthracis tagO Is Required for Vegetative Growth and Secondary Cell Wall Polysaccharide Synthesis. *J Bacteriol* **197**, 3511-3520 (2015).
17. Bonnet, J. et al. Nascent teichoic acids insertion into the cell wall directs the localization and activity of the major pneumococcal autolysin LytA. *The Cell Surface* **2**, 24-37 (2018).
18. Nakano, K., Nomura, R., Nakagawa, I., Hamada, S. & Ooshima, T. Demonstration of *Streptococcus mutans* with a cell wall polysaccharide specific to a new serotype, k, in the human oral cavity. *J Clin Microbiol* **42**, 198-202 (2004).
19. Nakano, K. & Ooshima, T. Serotype classification of *Streptococcus mutans* and its detection outside the oral cavity. *Future Microbiol* **4**, 891-902 (2009).

20. St Michael, F. et al. Investigating the candidacy of the serotype specific rhamnan polysaccharide based glycoconjugates to prevent disease caused by the dental pathogen *Streptococcus mutans*. *Glycoconj J* **35**, 53-64 (2018).
21. Coligan, J.E., Kindt, T.J. & Krause, R.M. Structure of the streptococcal groups A, A-variant and C carbohydrates. *Immunochemistry* **15**, 755-760 (1978).
22. McCarty, M. Variation in the group-specific carbohydrate of group A streptococci. II. Studies on the chemical basis for serological specificity of the carbohydrates. *J Exp Med* **104**, 629-643 (1956).
23. van Sorge, N.M. et al. The classical Lancefield antigen of Group A Streptococcus is a virulence determinant with implications for vaccine design. *Cell Host Microbe* **15**, 729-740 (2014).
24. van der Beek, S.L. et al. GacA is essential for Group A Streptococcus and defines a new class of monomeric dTDP-4-dehydrorhamnose reductases (RmID). *Mol Microbiol* **98**, 946-962 (2015).
25. Shields, R.C., Zeng, L., Culp, D.J. & Burne, R.A. Genomewide Identification of Essential Genes and Fitness Determinants of *Streptococcus mutans* UA159. *mSphere* **3**(2018).
26. Kovacs, C.J., Faustoferri, R.C., Bischer, A.P. & Quivey, R.G., Jr. *Streptococcus mutans* requires mature rhamnose-glucose polysaccharides for proper pathophysiology, morphogenesis and cellular division. *Mol Microbiol* (2019).
27. Shields, R.C. et al. Repurposing the *Streptococcus mutans* CRISPR-Cas9 System to Understand Essential Gene Function. *PLoS Pathog* **16**, e1008344 (2020).
28. Edgar, R.J. et al. Discovery of glycerol phosphate modification on streptococcal rhamnose polysaccharides. *Nat Chem Biol* **15**, 463-471 (2019).
29. Mistou, M.Y., Sutcliffe, I.C. & van Sorge, N.M. Bacterial glycobiology: rhamnose-containing cell wall polysaccharides in Gram-positive bacteria. *FEMS Microbiol Rev* **40**, 464-479 (2016).

30. Rush, J.S. et al. The molecular mechanism of N-acetylglucosamine side-chain attachment to the Lancefield group A carbohydrate in *Streptococcus pyogenes*. *J Biol Chem* **292**, 19441-19457 (2017).
31. Brown, T.A., Jr. et al. A hypothetical protein of *Streptococcus mutans* is critical for biofilm formation. *Infect Immun* **73**, 3147-3151 (2005).
32. Shibata, Y., Kawada, M., Nakano, Y., Toyoshima, K. & Yamashita, Y. Identification and characterization of an autolysin-encoding gene of *Streptococcus mutans*. *Infect Immun* **73**, 3512-3520 (2005).
33. Ahn, S.J. & Burne, R.A. The *atlA* operon of *Streptococcus mutans*: role in autolysin maturation and cell surface biogenesis. *J Bacteriol* **188**, 6877-6888 (2006).
34. Yoshimura, G. et al. Identification and molecular characterization of an N-Acetylmuraminidase, Aml, involved in *Streptococcus mutans* cell separation. *Microbiol Immunol* **50**, 729-742 (2006).
35. Catt, D.M. & Gregory, R.L. *Streptococcus mutans* murein hydrolase. *J Bacteriol* **187**, 7863-7865 (2005).
36. Pedelacq, J.D., Cabantous, S., Tran, T., Terwilliger, T.C. & Waldo, G.S. Engineering and characterization of a superfolder green fluorescent protein. *Nat Biotechnol* **24**, 79-88 (2006).
37. Zapun, A., Vernet, T. & Pinho, M.G. The different shapes of cocci. *FEMS Microbiol Rev* **32**, 345-360 (2008).
38. Yamashita, Y. et al. A novel gene required for rhamnose-glucose polysaccharide synthesis in *Streptococcus mutans*. *J Bacteriol* **181**, 6556-6559 (1999).
39. Bischer, A.P., Kovacs, C.J., Faustoferri, R.C. & Quivey, R.G., Jr. Disruption of l-rhamnose biosynthesis results in severe growth defects in *Streptococcus mutans*. *J Bacteriol* (2019).
40. De, A. et al. Deficiency of RgpG causes major defects in cell division and biofilm formation, and deficiency of LytR-CpsA-Psr family proteins leads to accumulation of cell wall antigens in culture medium by *Streptococcus mutans*. *Appl Environ Microbiol* **83**(2017).

41. Shibata, Y., Yamashita, Y., Ozaki, K., Nakano, Y. & Koga, T. Expression and characterization of streptococcal rgp genes required for rhamnan synthesis in *Escherichia coli*. *Infect Immun* **70**, 2891-2898 (2002).
42. Zorzoli, A. et al. Group A, B, C, and G Streptococcus Lancefield antigen biosynthesis is initiated by a conserved alpha-d-GlcNAc-beta-1,4-l-rhamnosyltransferase. *J Biol Chem* **294**, 15237-15256 (2019).
43. Carlsson, S. et al. Affinity of galectin-8 and its carbohydrate recognition domains for ligands in solution and at the cell surface. *Glycobiology* **17**, 663-676 (2007).
44. Coulibaly, F.S. & Youan, B.B. Concanavalin A-polysaccharides binding affinity analysis using a quartz crystal microbalance. *Biosens Bioelectron* **59**, 404-411 (2014).
45. Kaspar, J. et al. Intercellular Communication via the comX-Inducing Peptide (XIP) of *Streptococcus mutans*. *J Bacteriol* **199**(2017).
46. Shockman, G.D. & Martin, J.T. Autolytic enzyme system of *Streptococcus faecalis*. IV. Electron microscopic observations of autolysin and lysozyme action. *J Bacteriol* **96**, 1803-1810 (1968).
47. Neuhaus, F.C. & Baddiley, J. A continuum of anionic charge: structures and functions of D-alanyl-teichoic acids in Gram-positive bacteria. *Microbiol Mol Biol Rev* **67**, 686-723 (2003).
48. Merzlyak, E.M. et al. Bright monomeric red fluorescent protein with an extended fluorescence lifetime. *Nat Methods* **4**, 555-557 (2007).
49. Rosenow, M.A., Huffman, H.A., Phail, M.E. & Wachter, R.M. The crystal structure of the Y66L variant of green fluorescent protein supports a cyclization-oxidation-dehydration mechanism for chromophore maturation. *Biochemistry* **43**, 4464-4472 (2004).
50. Dufour, D. & Levesque, C.M. Cell death of *Streptococcus mutans* induced by a quorum-sensing peptide occurs via a conserved streptococcal autolysin. *J Bacteriol* **195**, 105-114 (2013).

51. Kojima, N., Araki, Y. & Ito, E. Structural studies on the linkage unit of ribitol teichoic acid of *Lactobacillus plantarum*. *Eur J Biochem* **148**, 29-34 (1985).
52. Lehrman, M.A. & Gao, N. Alternative and sources of reagents and supplies of fluorophore-assisted carbohydrate electrophoresis(FACE). *Glycobiology* **13**, 1G-3G (2003).
53. Chaturvedi, S.K., Ma, J., Brown, P.H., Zhao, H. & Schuck, P. Measuring macromolecular size distributions and interactions at high concentrations by sedimentation velocity. *Nat Commun* **9**, 4415 (2018).
54. Schuck, P. Size-distribution analysis of macromolecules by sedimentation velocity ultracentrifugation and lamm equation modeling. *Biophys J* **78**, 1606-1619 (2000).
55. Brautigam, C.A. Calculations and Publication-Quality Illustrations for Analytical Ultracentrifugation Data. *Methods Enzymol* **562**, 109-133 (2015).
56. Stafford, W.F. & Braswell, E.H. Sedimentation velocity, multi-speed method for analyzing polydisperse solutions. *Biophys Chem* **108**, 273-279 (2004).
